# Supplementary material for: Genotyping-by-sequencing and genome-wide association study reveal genetic diversity and loci controlling agronomic traits in triticale
Source: Research Square preprint supplement (doi:10.21203/rs.3.rs-859874/v1), 2021-08-31
Supplement: Supplementary file 1 [file 096bc2384c92b2012774a454.xlsx]

## Sheet: Table S1
Table S1 Information on accessions used in this study
NO.	Name	Countary	Taxon in USDA-ARS	Genome	Chromosome deletion	Chromosome addition	The segment deletion of the short arm of chromosome 5R	The segment deletion of the long arm of chromosome 2D	1Dls/1Als	6Dss/6Ass	7Dls/7Als	The mutations of single cultivar
1	PI 386118	Ukraine	×Triticosecale spp.	R
2	PI 428785	Skåne län Sweden	×Triticosecale spp.	AB
3	PI 429003	Canada	×Triticosecale spp.	AB
4	PI 429004	Canada	×Triticosecale spp.	AB
5	CIxt 4	Georgia United States	×Triticosecale spp.	ABD
6	PI 308880	Zaragoza Aragón Spain	×Triticosecale spp.	ABD
7	PI 320250	Zaragoza Aragón Spain	×Triticosecale spp.	ABD
8	PI 428744	Japan	×Triticosecale spp.	ABD
9	PI 428745	Japan	×Triticosecale spp.	ABD		2R
10	PI 428756	Japan	×Triticosecale spp.	ABD				+
11	PI 428766	New York United States	×Triticosecale spp.	ABD
12	PI 428769	New York United States	×Triticosecale spp.	ABD
13	PI 428799	Shikoku Japan	×Triticosecale spp.	ABD
14	PI 428800	Shikoku Japan	×Triticosecale spp.	ABD
15	PI 428804	Manitoba Canada	×Triticosecale spp.	ABD
16	PI 428810	Berlin Germany	×Triticosecale spp.	ABD
17	PI 428811	Berlin Germany	×Triticosecale spp.	ABD
18	PI 428873	Auvergne-Rhône-Alpes France	×Triticosecale spp.	ABD
19	PI 428875	Auvergne-Rhône-Alpes France	×Triticosecale spp.	ABD
20	PI 428879	Auvergne-Rhône-Alpes France	×Triticosecale spp.	ABD				+
21	PI 428937	Skåne län Sweden	×Triticosecale spp.	ABD				+
22	PI 429000	China	×Triticosecale spp.	ABD
23	PI 429018	Manitoba Canada	×Triticosecale spp.	ABD				+
24	PI 429109	Manitoba Canada	×Triticosecale spp.	ABD	1D,6D	1R,6R		+
25	CIxt 28	China	×Triticosecale spp.	ABDR
26	CIxt 29	China	×Triticosecale spp.	ABDR			+
27	CIxt 30	China	×Triticosecale spp.	ABDR
28	CIxt 87	California United States	×Triticosecale spp.	ABDR
29	PI 355953	Moskva Russian Federation	×Triticosecale spp.	ABDR
30	PI 386115	Armenia	×Triticosecale spp.	ABDR	7D
31	PI 386140	Moskva Russian Federation	×Triticosecale spp.	ABDR			+
32	PI 414627	Beijing Shi China	×Triticosecale spp.	ABDR
33	PI 428758	Russian Federation	×Triticosecale spp.	ABDR	5R
34	PI 428760	Russian Federation	×Triticosecale spp.	ABDR			+
35	PI 428865	Auvergne-Rhône-Alpes France	×Triticosecale spp.	ABDR			+
36	PI 428866	Auvergne-Rhône-Alpes France	×Triticosecale spp.	ABDR				+
37	PI 428932	China	×Triticosecale spp.	ABDR
38	PI 428934	China	×Triticosecale spp.	ABDR
39	JS1	Beijing China	×Triticosecale spp.	ABDR	2R
40	JS2	Beijing China	×Triticosecale spp.	ABDR	1B,2R
41	JS3	Beijing China	×Triticosecale spp.	ABDR	2R		+
42	JS4	Beijing China	×Triticosecale spp.	ABDR	2R		+
43	JS5	Beijing China	×Triticosecale spp.	ABDR	2R
44	JS6	Beijing China	×Triticosecale spp.	ABDR	2R		+
45	JS7	Beijing China	×Triticosecale spp.	ABDR	2R			+
46	JS8	Beijing China	×Triticosecale spp.	ABDR	2R		+
47	CIxt 7	United States	×Triticosecale spp.	ABR
48	CIxt 34	Alabama United States	×Triticosecale spp.	ABR
49	CIxt 82	California United States	×Triticosecale spp.	ABR
50	CIxt 106	Arkansas United States	×Triticosecale spp.	ABR
51	PI 197133	Kyôto Japan	×Triticosecale spp.	ABR		6D
52	PI 218251	Honshu Japan	×Triticosecale spp.	ABR		2D						1Dls-insert
53	PI 256032	Madrid, Comunidad de Spain	×Triticosecale spp.	ABR
54	PI 358312	Delhi India	×Triticosecale spp.	ABR
55	PI 381435	Hungary	×Triticosecale spp.	ABR
56	PI 381436	Hungary	×Triticosecale spp.	ABR
57	PI 383409	Warszawa Poland	×Triticosecale spp.	ABR
58	PI 386147	Azerbaijan	×Triticosecale spp.	ABR
59	PI 386153	Azerbaijan	×Triticosecale spp.	ABR
60	PI 388660	Cape Province South Africa	×Triticosecale spp.	ABR
61	PI 388663	Cape Province South Africa	×Triticosecale spp.	ABR
62	PI 388670	Cape Province South Africa	×Triticosecale spp.	ABR
63	PI 388695	Cape Province South Africa	×Triticosecale spp.	ABR
64	PI 410904	Barcelona Spain	×Triticosecale spp.	ABR	2R	2D
65	PI 410906	Barcelona Spain	×Triticosecale spp.	ABR	2R	2D						7Als-Deltion
66	PI 414960	Dagestan, Respublika Russian Federation	×Triticosecale spp.	ABR
67	PI 414968	Dagestan, Respublika Russian Federation	×Triticosecale spp.	ABR
68	PI 428730	Japan	×Triticosecale spp.	ABR	2R	2D
69	PI 428732	Japan	×Triticosecale spp.	ABR	2R	2D
70	PI 428747	Japan	×Triticosecale spp.	ABR	2R	2D						3Dls-insert
71	PI 428768	New York United States	×Triticosecale spp.	ABR	2R	2D
72	PI 428825	Madrid, Comunidad de Spain	×Triticosecale spp.	ABR		2D
73	PI 428827	Russian Federation	×Triticosecale spp.	ABR					+			2Bls-Deltion
74	PI 428830	Russian Federation	×Triticosecale spp.	ABR
75	PI 428831	Russian Federation	×Triticosecale spp.	ABR	2R	2D
76	PI 428835	Russian Federation	×Triticosecale spp.	ABR	2R	2D						3Bss-Deltion
77	PI 428840	Manitoba Canada	×Triticosecale spp.	ABR		2D
78	PI 428851	Morocco	×Triticosecale spp.	ABR
79	PI 428876	Auvergne-Rhône-Alpes France	×Triticosecale spp.	ABR		2D
80	PI 428878	Auvergne-Rhône-Alpes France	×Triticosecale spp.	ABR
81	PI 428884	Hungary	×Triticosecale spp.	ABR
82	PI 428894	Hungary	×Triticosecale spp.	ABR
83	PI 428897	Madrid, Comunidad de Spain	×Triticosecale spp.	ABR
84	PI 428933	China	×Triticosecale spp.	ABR	2R	2D
85	PI 428938	Skåne län Sweden	×Triticosecale spp.	ABR
86	PI 428942	Berlin Germany	×Triticosecale spp.	ABR
87	PI 428949	Manitoba Canada	×Triticosecale spp.	ABR
88	PI 428981	Hungary	×Triticosecale spp.	ABR
89	PI 429001	China	×Triticosecale spp.	ABR	6A	6D
90	PI 429009	India	×Triticosecale spp.	ABR	2R	2D
91	PI 429010	India	×Triticosecale spp.	ABR	2R	2D
92	PI 429020	Ciudad de México Mexico	×Triticosecale spp.	ABR	2R	2D		+
93	PI 429043	India	×Triticosecale spp.	ABR	2R	2D
94	PI 429044	India	×Triticosecale spp.	ABR	2R	2D
95	PI 429048	India	×Triticosecale spp.	ABR	2R	2D
96	PI 429063	Skåne län Sweden	×Triticosecale spp.	ABR
97	PI 429064	Skåne län Sweden	×Triticosecale spp.	ABR
98	PI 429084	Warszawa Poland	×Triticosecale spp.	ABR
99	PI 429091	India	×Triticosecale spp.	ABR	2R	2D
100	PI 429095	India	×Triticosecale spp.	ABR	2R	2D
101	PI 429096	Berlin Germany	×Triticosecale spp.	ABR						+	+
102	PI 429097	Berlin Germany	×Triticosecale spp.	ABR						+	+
103	PI 429133	Sankt-Peterburg Russian Federation	×Triticosecale spp.	ABR
104	PI 429134	Warszawa Poland	×Triticosecale spp.	ABR	2R	2D
105	PI 429146	Warszawa Poland	×Triticosecale spp.	ABR
106	PI 429154	Uppsala län Sweden	×Triticosecale spp.	ABR
107	PI 429156	Uppsala län Sweden	×Triticosecale spp.	ABR
108	PI 429157	Uppsala län Sweden	×Triticosecale spp.	ABR
109	PI 429158	Uppsala län Sweden	×Triticosecale spp.	ABR
110	PI 429159	Uppsala län Sweden	×Triticosecale spp.	ABR
111	PI 429196	Ciudad de México Mexico	×Triticosecale spp.	ABR	2R	2D		+
112	PI 429218	Manitoba Canada	×Triticosecale spp.	ABR	2R
113	PI 429247	Manitoba Canada	×Triticosecale spp.	ABR
114	PI 429275	Dnipropetrovska oblast Ukraine	×Triticosecale spp.	ABR								2Dls-insert
115	PI 429280	Ciudad de México Mexico	×Triticosecale spp.	ABR	2R	2D		+
116	PI 434716	China	×Triticosecale spp.	ABR							+
117	PI 434887	Cape Province South Africa	×Triticosecale spp.	ABR
118	PI 483066	Australia	×Triticosecale spp.	ABR
119	PI 508249	Washington United States	×Triticosecale spp.	ABR
120	PI 511870	Alberta Canada	×Triticosecale spp.	ABR
121	PI 520122	Ciudad de México Mexico	×Triticosecale spp.	ABR	2R	2D
122	PI 520419	Brazil	×Triticosecale spp.	ABR
123	PI 520431	Australia	×Triticosecale spp.	ABR	2R	2D
124	PI 520434	Brazil	×Triticosecale spp.	ABR
125	PI 520440	Brazil	×Triticosecale spp.	ABR	2R	2D
126	PI 520442	Brazil	×Triticosecale spp.	ABR	2R	2D		+
127	PI 520454	Ciudad de México Mexico	×Triticosecale spp.	ABR	2R	2D
128	PI 520460	Ecuador	×Triticosecale spp.	ABR
129	PI 542528	Oregon United States	×Triticosecale spp.	ABR
130	PI 542537	Oregon United States	×Triticosecale spp.	ABR
131	PI 542541	Oregon United States	×Triticosecale spp.	ABR
132	PI 547079	California United States	×Triticosecale spp.	ABR
133	PI 552974	Alabama United States	×Triticosecale spp.	ABR
134	PI 559373	North Dakota United States	×Triticosecale spp.	ABR	2R	2D
135	PI 564432	Dobrich Bulgaria	×Triticosecale spp.	ABR	2R	2D		+
136	PI 564438	Dobrich Bulgaria	×Triticosecale spp.	ABR	2R	2D		+
137	PI 564439	Poland	×Triticosecale spp.	ABR
138	PI 564440	Dobrich Bulgaria	×Triticosecale spp.	ABR	2R	2D
139	PI 564442	Dobrich Bulgaria	×Triticosecale spp.	ABR
140	PI 564484	Plovdiv Bulgaria	×Triticosecale spp.	ABR	2R	2D
141	PI 564485	Plovdiv Bulgaria	×Triticosecale spp.	ABR	2R	2D
142	PI 564486	Italy	×Triticosecale spp.	ABR	2R	2D
143	PI 564738	Oregon United States	×Triticosecale spp.	ABR
144	PI 572929	Kharkivska oblast Ukraine	×Triticosecale spp.	ABR
145	PI 572950	Odeska oblast Ukraine	×Triticosecale spp.	ABR
146	PI 574290	Poland	×Triticosecale spp.	ABR
147	PI 574388	Arizona United States	×Triticosecale spp.	ABR	2R	2D
148	PI 587224	Romania	×Triticosecale spp.	ABR
149	PI 587225	England United Kingdom	×Triticosecale spp.	ABR	2R	2D
150	PI 587227	Dobrich Bulgaria	×Triticosecale spp.	ABR	2R	2D
151	PI 587237	Dobrich Bulgaria	×Triticosecale spp.	ABR	2R	2D
152	PI 587260	Australia	×Triticosecale spp.	ABR
153	PI 587263	Australia	×Triticosecale spp.	ABR
154	PI 587265	Australia	×Triticosecale spp.	ABR	2R	2D
155	PI 587266	Australia	×Triticosecale spp.	ABR
156	PI 587271	Germany	×Triticosecale spp.	ABR
157	PI 587304	Warszawa Poland	×Triticosecale spp.	ABR
158	PI 587313	Warszawa Poland	×Triticosecale spp.	ABR
159	PI 587348	Ciudad de México Mexico	×Triticosecale spp.	ABR	6A	2D,6D
160	PI 587358	Ciudad de México Mexico	×Triticosecale spp.	ABR
161	PI 587366	Ciudad de México Mexico	×Triticosecale spp.	ABR
162	PI 587423	California United States	×Triticosecale spp.	ABR
163	PI 587453	California United States	×Triticosecale spp.	ABR
164	PI 587478	California United States	×Triticosecale spp.	ABR
165	PI 587503	California United States	×Triticosecale spp.	ABR
166	PI 587548	California United States	×Triticosecale spp.	ABR
167	PI 591946		×Triticosecale spp.	ABR
168	PI 605421	Warszawa Poland	×Triticosecale spp.	ABR
169	PI 605447	Oregon United States	×Triticosecale spp.	ABR								3Dls-insert
170	PI 611204	South Africa	×Triticosecale spp.	ABR
171	PI 611205	South Africa	×Triticosecale spp.	ABR
172	PI 611206	South Africa	×Triticosecale spp.	ABR
173	PI 611273	Ciudad de México Mexico	×Triticosecale spp.	ABR	2R	2D		+
174	PI 611684	California United States	×Triticosecale spp.	ABR
175	PI 611689	Oregon United States	×Triticosecale spp.	ABR
176	PI 611856	Manitoba Canada	×Triticosecale spp.	ABR
177	PI 613157	México Mexico	×Triticosecale spp.	ABR	6A	6D
178	PI 613160	México Mexico	×Triticosecale spp.	ABR
179	PI 620762	Coahuila de Zaragoza Mexico	×Triticosecale spp.	ABR
180	PI 620763	Coahuila de Zaragoza Mexico	×Triticosecale spp.	ABR
181	HM588-596	Sichuan China	×Triticosecale spp.	ABR
182	HM600-10	Sichuan China	×Triticosecale spp.	ABR
183	HM603-8	Sichuan China	×Triticosecale spp.	ABR
184	Xinxiaoheimai 4	Xinjiang China	×Triticosecale spp.	ABR
185	ZS1048	Beijing China	×Triticosecale spp.	ABR
186	Shida 1	Xinjiang China	×Triticosecale spp.	ABR
187	CZHM236-240	Sichuan China	×Triticosecale spp.	ABR					+
188	ZS1877	Beijing China	×Triticosecale spp.	ABR
189	ZS1257	Beijing China	×Triticosecale spp.	ABR
190	ZS3528	Beijing China	×Triticosecale spp.	ABR
191	ZS3297	Beijing China	×Triticosecale spp.	ABR
192	ZS2712	Beijing China	×Triticosecale spp.	ABR
193	ZS3241	Beijing China	×Triticosecale spp.	ABR
194	ZS3366	Beijing China	×Triticosecale spp.	ABR
195	ZS3292	Beijing China	×Triticosecale spp.	ABR
196	ZS2830	Beijing China	×Triticosecale spp.	ABR
197	ZS1933	Beijing China	×Triticosecale spp.	ABR
198	ZS828	Beijing China	×Triticosecale spp.	ABR
199	Gannong 2	Gansu China	×Triticosecale spp.	ABR
Note: + denotes that the accession had the chromosome deletion or translocation.

## Sheet: Table S2
Table S2 Distribution of SNP markers on hexaploid triticale chromosomes
Genome	Chromosome	Number of SNP loci	Start	End	SNP density(kb/SNP)	SNPs/Mb
A	1A	23637	516399	594017111	25.109	39.8264
	2A	34791	287018	780571215	22.4278	44.5876
	3A	23038	79673	750637650	32.5791	30.6945
	4A	32553	212329	742826011	22.8124	43.8357
	5A	21543	33011	709758696	32.9446	30.354
	6A	15728	736487	617978954	39.2448	25.4811
	7A	36228	368686	736684559	20.3245	49.2017
Sum		187518			27.9203	37.7116
B	1B	30583	1260998	689837254	22.515	44.4148
	2B	31694	78880	800186665	25.2448	39.6122
	3B	35383	333316	829406790	23.4314	42.6778
	4B	24358	645746	673509748	27.6239	36.2005
	5B	26589	78057	712995220	26.8125	37.2961
	6B	29118	2064154	720810750	24.6839	40.5122
	7B	34493	65039	744404930	21.5794	46.3404
Sum		212218			24.5559	41.0077
R	1R	5290	649308	727088466	137.323	7.2821
	2R	44	27620728	908303965	20015.5	0.0499612
	3R	8029	1953096	956664892	118.908	8.40987
	4R	4172	716059	903424129	216.373	4.62165
	5R	3394	179432	875792055	257.988	3.87614
	6R	7735	269442	884719966	114.344	8.74554
	7R	5904	531320	890466604	150.734	6.63419
Sum		34568			3001.6	5.65992
Sum (A/B/R)		434304				28.1264

## Sheet: Table S3
Table S3 Phenotypic variation of 10 agronomic traits over three environments
Trait/Environment	Range	Average	SD	CV /%	Analysis of Variance
					G	E	G*E	H2
Plant height (PH)/cm	95.97-200.60	142.49	22.7	15.93	***	***	***	0.82
Spike length (SL)/cm	8.43-15.72	11.62	1.34	11.54	***	***	***	0.62
Uppermost internode length (UIL)/cm	16.10-45.50	28.76	5.08	17.73	***	***	***	0.47
Spikelet number per spike (SNS)	16.32-31.52	25.4	2.88	11.36	***	***	***	0.58
Grain number per spike (GNS)	25.05-86.82	53.22	10.65	20.02	***	***	***	0.75
Seed setting percentage (SSP)/%	46.68-82.47	66.72	6.18	9.26	***	***	***	0.37
Thousand-grain weight (TGW)/g	27.27-57.95	40.38	6.11	15.14	***	***	***	0.69
Grain area (GA)/mm2	17.70-28.87	22.17	1.98	8.95	***	***	***	0.75
Grain width (GW)/mm	2.66-3.70	3.22	0.19	5.8	***	***	***	0.72
Grain length (GL)/mm	6.85-9.58	8.13	0.49	6.03	***	***	***	0.8
Note: *** significant at the 0.001 probability level.

## Sheet: Table S4
Table S4 Details of significant MTAs linked to 10 agronomic traits identified by GWAS and based on wheat and rye genome annotations
Trait	Environments	Model	SNPs	Chromosome	Position	P.value	LOD	FDR_Adjusted_P-values	effect	Candidate genes	Nr	KEGG	Interpro	GO
PH	E1	FarmCPU	1Ars129975697	1A	129975697	1.44669e-10	9.83963	2.00279e-06	1.59506	NA	NA	NA	NA	NA
PH	E1/E2	FarmCPU	1Brs430515098	1B	430515098	7.97981e-08	7.09801	0.000405387	10.2164	NA	NA	NA	NA	NA
PH	E2	FarmCPU	1Brs666730557	1B	666730557	8.55018e-09	8.06802	0.00015646	-0.348633	NA	NA	NA	NA	NA
PH	E1	FarmCPU	1Brs666747943	1B	666747943	1.77162e-08	7.75163	0.000324188	0.353807	NA	NA	NA	NA	NA
PH	E3	FarmCPU	2Ars550587533	2A	550587533	1.91463e-08	7.71791	3.59817e-05	10.6698	TraesCS2A02G320800.1	BAJ95389.1/0/predicted protein [Hordeum vulgare subsp. vulgare]	26S proteasome regulatory subunit N7	PF10602/6.4E-53/26S proteasome subunit RPN7	molecular_function:GO:0030234//enzyme regulator activity;
										TraesCS2A02G320900.1	XP_020172452.1/0/elongator complex protein 3 [Aegilops tauschii subsp. tauschii] &gt;ADB92637.1 putative histone acetyltransferase ELP3 [Hordeum vulgare] &gt;BAJ91345.1 predicted protein [Hordeum vulgare subsp. vulgare] &gt;BAK08325.1 predicted protein [Hordeum vulgare subsp. vulgare]	elongator complex protein 3	PTHR11135:SF0/5.5E-246/--	molecular_function:GO:0003824//catalytic activity;GO:0051536//iron-sulfur cluster binding;
										TraesCS2A02G321000.1	XP_020172457.1/0/anaphase-promoting complex subunit 2 [Aegilops tauschii subsp. tauschii]	anaphase-promoting complex subunit 2	SM00182/5.5E-6/--	biological_process:GO:0006511//ubiquitin-dependent protein catabolic process;molecular_function:GO:0031625//ubiquitin protein ligase binding;
PH	E2	FarmCPU	2Ars308214231	2A	308214231	4.74048e-08	7.32418	8.0989e-05	4.09797	NA	NA	NA	NA	NA
PH	E1	FarmCPU	2Ars434835446	2A	434835446	5.29024e-08	7.27653	8.28495e-05	11.9822	NA	NA	NA	NA	NA
PH	E2	FarmCPU	2Ars514010592	2A	514010592	1.91463e-08	7.71791	3.59817e-05	10.6698	NA	NA	NA	NA	NA
PH	E2	FarmCPU	2Ars563102718	2A	563102718	1.91463e-08	7.71791	3.59817e-05	10.6698	NA	NA	NA	NA	NA
PH	E1	FarmCPU	2Ars587887099	2A	587887099	1.91463e-08	7.71791	3.59817e-05	10.6698	NA	NA	NA	NA	NA
PH	E3	FarmCPU	2Ars668792364	2A	668792364	1.91463e-08	7.71791	3.59817e-05	10.6698	NA	NA	NA	NA	NA
PH	E1	FarmCPU	2Ars755254475	2A	755254475	1.91463e-08	7.71791	3.59817e-05	10.6698	TraesCS2A02G546500.1	XP_020180301.1/3.73445e-143/geraniol 8-hydroxylase-like [Aegilops tauschii subsp. tauschii]	steroid 17alpha-monooxygenase / 17alpha-hydroxyprogesterone deacetylase	PTHR24298:SF317/1.4E-99/--	biological_process:GO:0055114//oxidation-reduction process;molecular_function:GO:0020037//heme binding;GO:0016705//oxidoreductase activity, acting on paired donors, with incorporation or reduction of molecular oxygen;GO:0005506//iron ion binding;
PH	E3	FarmCPU	2Brs331887277	2B	331887277	7.16653e-09	8.14469	0.0001363	11.2151	NA	NA	NA	NA	NA
PH	E3	FarmCPU	2Brs339850088	2B	339850088	3.29448e-09	8.48221	3.03178e-05	14.0399	NA	NA	NA	NA	NA
PH	E1	FarmCPU	2Brs381666130	2B	381666130	6.38968e-08	7.19452	0.000303814	9.07516	NA	NA	NA	NA	NA
PH	E2/E3	FarmCPU	2Brs402276613	2B	402276613	1.17515e-08	7.92991	0.000111751	7.56324	NA	NA	NA	NA	NA
PH	E2	FarmCPU	2Brs49285558	2B	49285558	8.49326e-09	8.07093	6.98808e-05	-0.728454	TraesCS2B02G087100.1	XP_020190232.1/9.16063e-90/two-component response regulator ORR42-like [Aegilops tauschii subsp. tauschii] &gt;EMT08948.1 Hybrid signal transduction histidine kinase I [Aegilops tauschii]	two-component response regulator ARR10-like	PF00072/3.5E-17/Response regulator receiver domain	biological_process:GO:0000160//phosphorelay signal transduction system;
										TraesCS2B02G087300.1	XP_020190231.1/0/wall-associated receptor kinase 3-like [Aegilops tauschii subsp. tauschii]	wall-associated receptor kinase 2	SM00179/1.1E-6/--	biological_process:GO:0006468//protein phosphorylation;molecular_function:GO:0005524//ATP binding;GO:0030247//polysaccharide binding;GO:0005509//calcium ion binding;GO:0004672//protein kinase activity;
PH	E3	FarmCPU	2Brs582101596	2B	582101596	6.28751e-11	10.2015	1.19582e-06	13.4747	NA	NA	NA	NA	NA
PH	E2	FarmCPU	2Brs603086094	2B	603086094	1.15453e-09	8.93759	2.19581e-05	13.7573	NA	NA	NA	NA	NA
PH	E2	FarmCPU	2Brs568716230	2B	568716230	4.78224e-09	8.32037	3.03178e-05	14.3489	TraesCS2B02G400400.1	XP_020174302.1/4.47749e-50/uncharacterized protein LOC109759875 [Aegilops tauschii subsp. tauschii] &gt;EMT13383.1 hypothetical protein F775_18123 [Aegilops tauschii]	ghi:107902778/8e-09/LOW QUALITY PROTEIN: nuclear speckle splicing regulatory protein 1; K13206 coiled-coil domain-containing protein 55	coiled-coil domain-containing protein 55	NA
PH	E3	FarmCPU	2Brs71355440	2B	71355440	1.0967e-08	7.95991	0.000104291	0.253983	TraesCS2B02G110000.1	XP_020179224.1/6.66557e-35/uncharacterized protein LOC109764851 [Aegilops tauschii subsp. tauschii]	NA	NA	NA
										TraesCS2B02G110100.2	XP_020179224.1/4.49559e-31/uncharacterized protein LOC109764851 [Aegilops tauschii subsp. tauschii]	NA	NA	NA
PH	E2	FarmCPU	2Brs720623630	2B	720623630	2.35311e-10	9.62836	4.47537e-06	-0.392869	TraesCS2B02G526300.2	XP_020166705.1/0/uncharacterized protein LOC109752212 [Aegilops tauschii subsp. tauschii] &gt;XP_020166706.1 uncharacterized protein LOC109752212 [Aegilops tauschii subsp. tauschii]	DnaJ homolog subfamily C member 8	PF12572/1.1E-25/Protein of unknown function (DUF3752)	NA
PH	E3	FarmCPU	2Brs733786888	2B	733786888	4.61024e-08	7.33628	0.000292274	5.88014	TraesCS2B02G538500.1	XP_020198903.1/0/probable inactive receptor kinase At5g16590 [Aegilops tauschii subsp. tauschii]	interleukin-1 receptor-associated kinase 4	PTHR27008:SF19/3.6E-251/--	biological_process:GO:0006468//protein phosphorylation;molecular_function:GO:0005524//ATP binding;GO:0004672//protein kinase activity;
PH	E3	FarmCPU	2Brs749625894	2B	749625894	1.15811e-08	7.93625	6.40053e-05	-8.34691	NA	NA	NA	NA	NA
PH	E1	FarmCPU	3Ars172136008	3A	172136008	4.42319e-08	7.35426	0.000415581	17.2026	NA	NA	NA	NA	NA
PH	E1	FarmCPU	3Ars273847756	3A	273847756	6.06874e-08	7.2169	0.00110742	-1.71707	NA	NA	NA	NA	NA
PH	E1	FarmCPU	3Ars391811537	3A	391811537	8.74051e-08	7.05846	0.000547476	-0.866715	NA	NA	NA	NA	NA
PH	E3	FarmCPU	3Ars569659917	3A	569659917	2.68768e-08	7.57062	0.000168347	0.770714	TraesCS3A02G325000.1	XP_020164098.1/4.71388e-155/importin subunit beta-1-like [Aegilops tauschii subsp. tauschii] &gt;XP_020164099.1 importin subunit beta-1-like [Aegilops tauschii subsp. tauschii]	importin subunit beta-1	PTHR10527:SF44/4.8E-76/--	biological_process:GO:0006913//nucleocytoplasmic transport;molecular_function:GO:0005515//protein binding;GO:0008565//protein transporter activity;
										TraesCS3A02G325100.2	EMS61609.1/0/Peroxidase 56 [Triticum urartu]	peroxidase	PS50873/61.194/Plant heme peroxidase family profile.	biological_process:GO:0006979//response to oxidative stress;GO:0055114//oxidation-reduction process;molecular_function:GO:0020037//heme binding;GO:0004601//peroxidase activity;
										TraesCS3A02G325100.3	CDM84504.1/3.37198e-88/unnamed protein product [Triticum aestivum]	peroxidase	PS50873/32.799/Plant heme peroxidase family profile.	biological_process:GO:0006979//response to oxidative stress;GO:0055114//oxidation-reduction process;molecular_function:GO:0020037//heme binding;GO:0004601//peroxidase activity;
PH	E1	FarmCPU	3Ars609205231	3A	609205231	2.4652e-08	7.60815	9.2647e-05	8.31209	NA	NA	NA	NA	NA
PH	E1	FarmCPU	3Brs151174078	3B	151174078	5.4998e-08	7.25965	0.000642174	-9.88858	TraesCS3B02G157400.1	XP_020200881.1/0/uncharacterized protein LOC109786727 [Aegilops tauschii subsp. tauschii]	NA	PTHR36892:SF1/7.3E-178/--	NA
										TraesCS3B02G157400.2	CDM82081.1/0/unnamed protein product [Triticum aestivum]	NA	PTHR36892:SF1/2.1E-134/--	NA
PH	E1	FarmCPU	3Brs258997195	3B	258997195	3.98254e-09	8.39984	2.78685e-05	-12.9268	NA	NA	NA	NA	NA
PH	E1	FarmCPU	3Brs508522077	3B	508522077	1.48775e-09	8.82747	1.56162e-05	-12.9101	TraesCS3B02G316600.1	CDM84075.1/0/unnamed protein product [Triticum aestivum]	LRR receptor-like serine/threonine-protein kinase FLS2	PTHR45183/8.9E-224/--	molecular_function:GO:0005515//protein binding;
										TraesCS3B02G316700.1	CDM84074.1/0/unnamed protein product [Triticum aestivum]	NA	PTHR13353:SF7/5.8E-147/--	cellular_component:GO:0016021//integral component of membrane;
										TraesCS3B02G316700.2	CDM84074.1/3.43374e-153/unnamed protein product [Triticum aestivum]	NA	PF01940/6.5E-26/Integral membrane protein DUF92	cellular_component:GO:0016021//integral component of membrane;
										TraesCS3B02G316800.1	XP_020183199.1/0/oil body-associated protein 2B-like [Aegilops tauschii subsp. tauschii]	NA	PF06884/1.1E-64/Protein of unknown function (DUF1264)	NA
PH	E1	FarmCPU	4Ars110442599	4A	110442599	4.68729e-09	8.32908	4.53542e-05	-16.808	NA	NA	NA	NA	NA
PH	E2	FarmCPU	4Ars57023638	4A	57023638	7.3085e-08	7.13617	0.000471447	8.56489	NA	NA	NA	NA	NA
PH	E2	FarmCPU	4Ars613317388	4A	613317388	1.16531e-10	9.93356	1.27116e-06	-4.00025	TraesCS4A02G325300.1	XP_020169741.1/0/pentatricopeptide repeat-containing protein At4g25270, chloroplastic [Aegilops tauschii subsp. tauschii] &gt;EMT12389.1 hypothetical protein F775_33099 [Aegilops tauschii]	pentatricopeptide repeat-containing protein At4g25270	PTHR24015:SF497/4.2E-168/--	NA
										TraesCS4A02G325400.1	EMS59255.1/0/Putative flavin-containing monooxygenase YUCCA11 [Triticum urartu]	indole-3-pyruvate monooxygenase	PR00469/1.1E-8/Pyridine nucleotide disulphide reductase class-II signature	biological_process:GO:0055114//oxidation-reduction process;molecular_function:GO:0016491//oxidoreductase activity;
										TraesCS4A02G325400.2	EMS59255.1/0/Putative flavin-containing monooxygenase YUCCA11 [Triticum urartu]	indole-3-pyruvate monooxygenase [EC:1.14.13.168]	PTHR43539/7.5E-166/--	biological_process:GO:0055114//oxidation-reduction process;molecular_function:GO:0016491//oxidoreductase activity;
										TraesCS4A02G325400.3	EMS59255.1/0/Putative flavin-containing monooxygenase YUCCA11 [Triticum urartu]	indole-3-pyruvate monooxygenase [EC:1.14.13.168]	PR00469/1.2E-8/Pyridine nucleotide disulphide reductase class-II signature	biological_process:GO:0055114//oxidation-reduction process;molecular_function:GO:0016491//oxidoreductase activity;
										TraesCS4A02G325500.1	XP_020169747.1/1.02051e-110/ycf20-like protein [Aegilops tauschii subsp. tauschii]	NA	PTHR33787/5.8E-79/--	NA
										TraesCS4A02G325500.2	XP_020169747.1/1.35835e-129/ycf20-like protein [Aegilops tauschii subsp. tauschii]	NA	PF04483/2.5E-17/Protein of unknown function (DUF565)	NA
										TraesCS4A02G325600.1	XP_020169749.1/3.91425e-86/uncharacterized protein LOC109755253 [Aegilops tauschii subsp. tauschii]	NA	PTHR35110/1.5E-72/--	NA
										TraesCS4A02G325700.1	XP_020169761.1/0/receptor kinase-like protein Xa21 [Aegilops tauschii subsp. tauschii] &gt;EMT32317.1 Putative LRR receptor-like serine/threonine-protein kinase [Aegilops tauschii]	LRR receptor-like serine/threonine-protein kinase EFR	PF07714/8.5E-44/Protein tyrosine kinase	biological_process:GO:0006468//protein phosphorylation;molecular_function:GO:0005524//ATP binding;GO:0005515//protein binding;GO:0004672//protein kinase activity;
										TraesCS4A02G325800.1	XP_020169754.1/3.7954e-30/mucin-1-like [Aegilops tauschii subsp. tauschii]	NA	NA	NA
PH	E2	FarmCPU	4Ars679023883	4A	679023883	8.5946e-09	8.06577	8.31613e-05	0.199773	TraesCS4A02G405900.1	XP_020183370.1/2.38302e-117/uncharacterized protein LOC109769043 [Aegilops tauschii subsp. tauschii] &gt;XP_020198496.1 uncharacterized protein LOC109784309 [Aegilops tauschii subsp. tauschii]	NA	PTHR31659/4.4E-82/--	NA
										TraesCS4A02G406000.1	XP_020198497.1/0/tropomyosin-1, isoforms 33/34-like [Aegilops tauschii subsp. tauschii]	NA	PTHR35164/1.4E-238/--	NA
PH	E1	FarmCPU	4Brs21976888	4B	21976888	5.76025e-09	8.23956	6.1099e-05	6.12677	TraesCS4B02G029600.1	XP_020195940.1/0/protein NRT1/ PTR FAMILY 2.11-like [Aegilops tauschii subsp. tauschii]	solute carrier family 15 (peptide/histidine transporter)	PF00854/5.5E-83/POT family	biological_process:GO:0055085//transmembrane transport;cellular_component:GO:0016020//membrane;molecular_function:GO:0022857//transmembrane transporter activity;
										TraesCS4B02G029700.3	XP_020195938.1/0/actin cytoskeleton-regulatory complex protein SLA1-like isoform X1 [Aegilops tauschii subsp. tauschii]	5'-AMP-activated protein kinase	PTHR10343/2.1E-176/--	NA
PH	E1/E3	FarmCPU	4Brs411827353	4B	411827353	1.69813e-13	12.77	1.8012e-09	10.3527	TraesCS4B02G189300.1	XP_020148271.1/3.16779e-92/CASP-like protein 4B2 [Aegilops tauschii subsp. tauschii]	NA	PF04535/4.1E-27/Domain of unknown function (DUF588)	NA
PH	E3	FarmCPU	4Brs560074936	4B	560074936	1.0961e-08	7.96015	0.000116264	4.99134	NA	NA	NA	NA	NA
PH	E2	FarmCPU	4Brs61996205	4B	61996205	6.33423e-08	7.19831	0.000223957	13.7667	NA	NA	NA	NA	NA
PH	E1	FarmCPU	4Brs61996246	4B	61996246	2.43428e-09	8.61363	1.29102e-05	12.798	NA	NA	NA	NA	NA
PH	E3	FarmCPU	4Brs96475374	4B	96475374	7.28169e-10	9.13777	7.72369e-06	12.4454	TraesCS4B02G093800.1	EMT21143.1/4.0696e-36/hypothetical protein F775_01097 [Aegilops tauschii]	NA	PTHR33033/3.6E-20/--	NA
PH	E1/E2/E3	FarmCPU	5Ars29954289	5A	29954289	5.44341e-09	8.26413	3.83202e-05	15.8048	TraesCS5A02G032800.1	P93184.1/0/RecName: Full=Lipoxygenase 2.1, chloroplastic; AltName: Full=LOX-100; AltName: Full=LOX2:Hv:1; Flags: Precursor &gt;AAC12951.1 methyljasmonate-inducible lipoxygenase 2 [Hordeum vulgare subsp. vulgare]	methyljasmonate-inducible lipoxygenase 2	PF00305/1.7E-159/Lipoxygenase	biological_process:GO:0055114//oxidation-reduction process;molecular_function:GO:0016702//oxidoreductase activity, acting on single donors with incorporation of molecular oxygen, incorporation of two atoms of oxygen;GO:0046872//metal ion binding;GO:0016491//oxidoreductase activity;
PH	E1	FarmCPU	5Ars376262220	5A	376262220	1.3385e-09	8.87338	5.09167e-06	-9.96944	NA	NA	NA	NA	NA
PH	E1	FarmCPU	5Ars510650911	5A	510650911	5.31468e-08	7.27452	0.00020217	9.89337	NA	NA	NA	NA	NA
PH	E2	FarmCPU	5Ars662501086	5A	662501086	1.63526e-08	7.78641	0.000186616	-1.06755	TraesCS5A02G493700.1	XP_020186451.1/1.03112e-65/DET1- and DDB1-associated protein 1 [Aegilops tauschii subsp. tauschii]	DET1- and DDB1-associated protein 1	PF10172/6.8E-26/Det1 complexing ubiquitin ligase	biological_process:GO:0032434//regulation of proteasomal ubiquitin-dependent protein catabolic process;
										TraesCS5A02G493800.1	XP_020186452.1/0/probable serine/threonine-protein kinase At1g01540 [Aegilops tauschii subsp. tauschii]	probable serine/threonine-protein kinase At1g01540	PTHR27001:SF156/4.9E-236/--	biological_process:GO:0006468//protein phosphorylation;molecular_function:GO:0005524//ATP binding;GO:0004672//protein kinase activity;
										TraesCS5A02G493800.2	XP_020186452.1/0/probable serine/threonine-protein kinase At1g01540 [Aegilops tauschii subsp. tauschii]	probable serine/threonine-protein kinase At1g01540	PTHR27001/1.5E-220/--	biological_process:GO:0006468//protein phosphorylation;molecular_function:GO:0005524//ATP binding;GO:0004672//protein kinase activity;
PH	E3	FarmCPU	5Brs200185744	5B	200185744	7.29695e-08	7.13686	0.000406106	-14.0107	NA	NA	NA	NA	NA
PH	E3	FarmCPU	5Brs251095896	5B	251095896	1.9468e-08	7.71068	0.000310885	-1.64416	NA	NA	NA	NA	NA
PH	E1	FarmCPU	5Brs352364193	5B	352364193	1.01469e-07	6.99366	0.00162037	10.6647	TraesCS5B02G195100.2	XP_020173552.1/0/serine/threonine-protein kinase 16 isoform X2 [Aegilops tauschii subsp. tauschii]	serine/threonine kinase 16	PS00108/-/Serine/Threonine protein kinases active-site signature.	biological_process:GO:0006468//protein phosphorylation;molecular_function:GO:0005524//ATP binding;GO:0004672//protein kinase activity;
PH	E2	FarmCPU	5Brs419376679	5B	419376679	5.92351e-10	9.22742	9.45925e-06	-0.409079	TraesCS5B02G238400.1	XP_020193752.1/0/prostaglandin reductase-3-like [Aegilops tauschii subsp. tauschii]	prostaglandin reductase-3-like	PTHR43677/1.3E-165/--	biological_process:GO:0055114//oxidation-reduction process;molecular_function:GO:0008270//zinc ion binding;GO:0016491//oxidoreductase activity;
PH	E3	FarmCPU	5Brs48027479	5B	48027479	1.14563e-07	6.94096	0.000914729	-4.29758	NA	NA	NA	NA	NA
PH	E1	FarmCPU	5Brs593070022	5B	593070022	6.78004e-10	9.16877	1.0827e-05	-10.5109	NA	NA	NA	NA	NA
PH	E3	FarmCPU	5Brs596700381	5B	596700381	4.91303e-08	7.30865	0.000784562	-0.170322	NA	NA	NA	NA	NA
PH	E1	FarmCPU	5Brs705585232	5B	705585232	9.23485e-13	12.0346	1.47471e-08	12.0718	TraesCS5B02G558000.1	XP_020191376.1/6.30049e-37/E2 ubiquitin-protein ligase SGR9, amyloplastic-like [Aegilops tauschii subsp. tauschii]	E2 ubiquitin-protein ligase AIP2	PF13639/2.8E-9/Ring finger domain	NA
										TraesCS5B02G558100.2	EMS54218.1/0/putative WRKY transcription factor 14 [Triticum urartu]	WRKY transcription factor 22	PTHR32096:SF28/1.2E-100/--	biological_process:GO:0006355//regulation of transcription, DNA-templated;molecular_function:GO:0043565//sequence-specific DNA binding;GO:0003700//DNA binding transcription factor activity;
PH	E1/E2/E3	FarmCPU	6Ars3762529	6A	3762529	1.39022e-11	10.8569	1.22659e-07	12.8514	TraesCS6A02G009000.1	XP_020149488.1/0/bidirectional sugar transporter SWEET14-like [Aegilops tauschii subsp. tauschii] &gt;EMT20480.1 Protein RUPTURED POLLEN GRAIN 1 [Aegilops tauschii]	sugar transporter SWEET14-like	PTHR10791:SF56/3.3E-138/--	cellular_component:GO:0016021//integral component of membrane;
										TraesCS6A02G009100.1	XP_020149490.1/0/bidirectional sugar transporter SWEET14-like [Aegilops tauschii subsp. tauschii]	sugar transporter SWEET14-like	PTHR10791:SF56/2.1E-142/--	cellular_component:GO:0016021//integral component of membrane;
PH	E2	FarmCPU	6Ars466853892	6A	466853892	1.25445e-08	7.90155	5.53401e-05	2.45809	TraesCS6A02G252500.1	XP_020194854.1/0/protein RMD5 homolog A-like [Aegilops tauschii subsp. tauschii] &gt;XP_020194855.1 protein RMD5 homolog A-like [Aegilops tauschii subsp. tauschii] &gt;XP_020194856.1 protein RMD5 homolog A-like [Aegilops tauschii subsp. tauschii] &gt;XP_020194858.1 protein RMD5 homolog A-like [Aegilops tauschii subsp. tauschii]	macrophage erythroblast attacher	PF13445/1.0E-5/RING-type zinc-finger	NA
PH	E1	FarmCPU	6Ars500398822	6A	500398822	5.44348e-10	9.26412	4.80278e-06	-0.367379	NA	NA	NA	NA	NA
PH	E1	FarmCPU	6Ars597771467	6A	597771467	3.58232e-09	8.44584	3.16068e-05	-20.5204	TraesCS6A02G375200.1	XP_020159894.1/0/protein SRG1-like [Aegilops tauschii subsp. tauschii]	flavonol synthase	PF14226/5.6E-22/non-haem dioxygenase in morphine synthesis N-terminal	biological_process:GO:0055114//oxidation-reduction process;molecular_function:GO:0016491//oxidoreductase activity;
										TraesCS6A02G375300.1	XP_020159893.1/0/agmatine coumaroyltransferase-2-like [Aegilops tauschii subsp. tauschii]	shikimate O-hydroxycinnamoyltransferase	PF02458/1.2E-73/Transferase family	molecular_function:GO:0016747//transferase activity, transferring acyl groups other than amino-acyl groups;
										TraesCS6A02G375400.1	EMS58811.1/0/hypothetical protein TRIUR3_19206 [Triticum urartu]	clathrin interactor EPSIN 2	PTHR12276:SF45/3.7E-137/--	NA
PH	E2	FarmCPU	6Brs133342709	6B	133342709	2.10183e-08	7.6774	0.000113732	-9.74943	TraesCS6B02G136000.1	BAK07008.1/0/predicted protein [Hordeum vulgare subsp. vulgare]	NA	PF12937/1.9E-5/F-box-like	molecular_function:GO:0005515//protein binding;
										TraesCS6B02G136100.1	CDM83846.1/0/unnamed protein product [Triticum aestivum]	G-type lectin S-receptor-like serine/threonine-protein kinase LECRK1	PS00108/-/Serine/Threonine protein kinases active-site signature.	biological_process:GO:0048544//recognition of pollen;GO:0006468//protein phosphorylation;molecular_function:GO:0005524//ATP binding;GO:0004672//protein kinase activity;
PH	E1	FarmCPU	6Brs197201996	6B	197201996	9.6577e-09	8.01513	0.000139602	1.19545	TraesCS6B02G178100.1	CAH67349.1/1.41658e-17/OSIGBa0130B08.9 [Oryza sativa]	NA	PTHR33116/2.7E-13/--	NA
PH	E2	FarmCPU	6Brs26245734	6B	26245734	5.10384e-08	7.2921	0.000253497	-1.75944	TraesCS6B02G042800.1	EMT16600.1/0/hypothetical protein F775_22929 [Aegilops tauschii]	NA	PTHR31790/5.6E-80/--	molecular_function:GO:0005515//protein binding;
										TraesCS6B02G042900.1	XP_020179406.1/0/probable acyl-activating enzyme 5, peroxisomal [Aegilops tauschii subsp. tauschii] &gt;EMT04966.1 Medium-chain-fatty-acid--CoA ligase [Aegilops tauschii]	acetate---CoA ligase	PF00501/3.5E-86/AMP-binding enzyme	biological_process:GO:0008152//metabolic process;molecular_function:GO:0003824//catalytic activity;
										TraesCS6B02G043000.1	XP_020179416.1/0/uncharacterized protein LOC109765037 [Aegilops tauschii subsp. tauschii]	mTERF domain-containing protein	PF02536/5.7E-28/mTERF	biological_process:GO:0006355//regulation of transcription, DNA-templated;molecular_function:GO:0003690//double-stranded DNA binding;
										TraesCS6B02G043100.1	XP_020179396.1/0/transcription termination factor MTERF8, chloroplastic-like [Aegilops tauschii subsp. tauschii]	transcription termination factor MTERF8	PF02536/1.3E-20/mTERF	biological_process:GO:0006355//regulation of transcription, DNA-templated;molecular_function:GO:0003690//double-stranded DNA binding;
PH	E1	FarmCPU	6Brs529214280	6B	529214280	4.45192e-08	7.35145	0.000643525	-12.6916	NA	NA	NA	NA	NA
PH	E2	FarmCPU	6Brs610522265	6B	610522265	5.26109e-08	7.27892	0.000253497	-1.64256	NA	NA	NA	NA	NA
PH	E2	FarmCPU	7Ars551711926	7A	551711926	3.76841e-08	7.42384	0.00081228	0.806837	NA	NA	NA	NA	NA
PH	E1	FarmCPU	7Ars563563053	7A	563563053	8.82242e-08	7.05441	0.000950836	3.23609	TraesCS7A02G387500.1	OQU76777.1/3.83717e-47/hypothetical protein SORBI_3010G206600, partial [Sorghum bicolor]	NAD(P)H-quinone oxidoreductase subunit 2	NA	NA
										TraesCS7A02G387600.1	KXG35201.1/4.61183e-38/hypothetical protein SORBI_3002G145600 [Sorghum bicolor]	NA	NA	NA
										TraesCS7A02G387700.1	ONM32085.1/3.57972e-107/NADH dehydrogenase subunit 7 [Zea mays]	NADH dehydrogenase (ubiquinone) Fe-S protein 2	PF00346/9.3E-35/Respiratory-chain NADH dehydrogenase, 49 Kd subunit	biological_process:GO:0055114//oxidation-reduction process;molecular_function:GO:0016651//oxidoreductase activity, acting on NAD(P)H;GO:0051287//NAD binding;GO:0048038//quinone binding;
										TraesCS7A02G387800.1	YP_514650.1/2.92835e-84/ribosomal protein S12 (mitochondrion) [Oryza sativa Indica Group] &gt;YP_002000567.1 ribosomal protein S12 (mitochondrion) [Oryza sativa Japonica Group] &gt;YP_003433843.1 ribosomal protein small subunit 12 (mitochondrion) [Oryza rufipogon] &gt;YP_009241988.1 ribosomal protein S12 (mitochondrion) [Oryza minuta] &gt;YP_009242007.1 ribosomal protein S12 (mitochondrion) [Oryz…	small subunit ribosomal protein S12	PF00164/1.1E-33/Ribosomal protein S12/S23	biological_process:GO:0006412//translation;cellular_component:GO:0005840//ribosome;GO:0005622//intracellular;molecular_function:GO:0003735//structural constituent of ribosome;
										TraesCS7A02G387900.1	YP_740363.1/4.50248e-77/NADH dehydrogenase subunit 3 (mitochondrion) [Zea perennis] &gt;YP_740442.1 NADH dehydrogenase subunit 3 (mitochondrion) [Zea luxurians] &gt;YP_740388.1 NADH dehydrogenase subunit 3 (mitochondrion) [Zea mays subsp. parviglumis] &gt;YP_762508.1 NADH dehydrogenase subunit 3 (mitochondrion) [Tripsacum dactyloides] &gt;CAA32833.1 unnamed protein product (mitochondrion) [Zea ma…	NADH-ubiquinone oxidoreductase chain 3	PF00507/2.8E-25/NADH-ubiquinone/plastoquinone oxidoreductase, chain 3	biological_process:GO:0055114//oxidation-reduction process;molecular_function:GO:0008137//NADH dehydrogenase (ubiquinone) activity;
										TraesCS7A02G388000.1	AGQ55692.1/7.41257e-42/photosystem II protein V (chloroplast) [Alstroemeria aurea] &gt;ANO44522.1 photosystem II cytochrome b559 alpha subunit (chloroplast) [Alstroemeria longistaminea]	photosystem II cytochrome b559 subunit alpha	PS00537/-/Cytochrome b559 subunits heme-binding site signature.	biological_process:GO:0019684//photosynthesis, light reaction;GO:0009767//photosynthetic electron transport chain;GO:0015979//photosynthesis;cellular_component:GO:0009539//photosystem II reaction center;GO:0009523//photosystem II;GO:0016021//integral component of membrane;molecular_function:GO:0020037//heme binding;GO:0046872//metal ion binding;
										TraesCS7A02G388100.1	EMS46821.1/8.34393e-34/hypothetical protein TRIUR3_05325 [Triticum urartu] &gt;EMS58321.1 hypothetical protein TRIUR3_26213 [Triticum urartu]	NAD(P)H-quinone oxidoreductase subunit 2	NA	NA
										TraesCS7A02G388200.1	AQL03709.1/5.4622e-85/NADH dehydrogenase 1A [Zea mays]	NADH-ubiquinone oxidoreductase chain 1	PF00146/1.3E-34/NADH dehydrogenase	biological_process:GO:0055114//oxidation-reduction process;cellular_component:GO:0016020//membrane;
PH	E2	FarmCPU	7Ars723125605	7A	723125605	1.18544e-07	6.92612	0.00255521	0.524823	NA	NA	NA	NA	NA
PH	E3	FarmCPU	7Brs130034574	7B	130034574	4.39144e-08	7.35739	0.000928922	22.9001	NA	NA	NA	NA	NA
PH	E1/E3	FarmCPU	7Brs181806817	7B	181806817	4.94509e-11	10.3058	1.04604e-06	22.3832	NA	NA	NA	NA	NA
PH	E2	FarmCPU	7Brs185462555	7B	185462555	4.31821e-09	8.3647	4.56716e-05	0.865193	NA	NA	NA	NA	NA
PH	E2	FarmCPU	7Brs681277412	7B	681277412	3.85528e-08	7.41394	0.000163101	-0.639659	NA	NA	NA	NA	NA
PH	E2/E3	FarmCPU	NewChr1rs122212247	1R	122212247	3.65041e-08	7.43766	0.00023429	1.18426	Sc1Loc01952146.8	XP_020174216.1/0/CTP synthase-like [Aegilops tauschii subsp. tauschii] &gt;EMT05976.1 CTP synthase [Aegilops tauschii]	class I glutamine amidotransferase	PS51273/22.148/Glutamine amidotransferase type 1 domain profile.	biological_process:GO:0006221//pyrimidine nucleotide biosynthetic process;molecular_function:GO:0003883//CTP synthase activity;
PH	E2	FarmCPU	NewChr1rs172353510	1R	172353510	2.77038e-08	7.55746	0.000230856	-15.3625	Sc1Loc01449949.1	XP_020151403.1/0/putative serine/threonine-protein kinase-like protein CCR3 [Aegilops tauschii subsp. tauschii]	serine/threonine-protein kinase-like protein CCR4	PS00107/-/Protein kinases ATP-binding region signature.	biological_process:GO:0006468//protein phosphorylation;molecular_function:GO:0005524//ATP binding;GO:0004672//protein kinase activity;
										Sc1Loc01966745.2	XP_020177165.1/0/uncharacterized protein LOC109762700 isoform X1 [Aegilops tauschii subsp. tauschii] &gt;EMT32791.1 Putative ubiquitin carrier protein E1 37 [Aegilops tauschii]	ubiquitin-conjugating enzyme E1 T	PS50127/35.958/Ubiquitin-conjugating enzymes family profile.	NA
										Sc1Loc01981017.4	EMT11418.1/0/Cyclin-dependent kinase E-1 [Aegilops tauschii]	cyclin-dependent kinase	PS00107/-/Protein kinases ATP-binding region signature.	biological_process:GO:0006468//protein phosphorylation;molecular_function:GO:0005524//ATP binding;GO:0004672//protein kinase activity;
PH	E3	FarmCPU	NewChr1rs246044183	1R	246044183	9.51416e-09	8.02163	7.92815e-05	1.54768	Sc0Loc02104569.3	XP_020146503.1/0/putative disease resistance RPP13-like protein 3 [Aegilops tauschii subsp. tauschii] &gt;XP_020146504.1 putative disease resistance RPP13-like protein 3 [Aegilops tauschii subsp. tauschii]	disease resistance protein RPM1	PF00931/5.2E-31/NB-ARC domain	molecular_function:GO:0043531//ADP binding;
PH	E3	FarmCPU	NewChr1rs53982416	1R	53982416	2.27534e-09	8.64295	1.89604e-05	5.2753	NA	NA	NA	NA	NA
PH	E1	FarmCPU	NewChr2rs177491851	2R	177491851	1.0725e-08	7.9696	8.93713e-05	-0.457033	NA	NA	NA	NA	NA
PH	E3	FarmCPU	NewChr2rs254797988	2R	254797988	1.10352e-07	6.95722	0.00030652	0.183818	NA	NA	NA	NA	NA
PH	E2/E3	FarmCPU	NewChr3rs118211319	3R	118211319	1.40925e-08	7.85101	3.91442e-05	-15.8316	NA	NA	NA	NA	NA
PH	E1/E2/E3	FarmCPU	NewChr5rs148736541	5R	148736541	2.71166e-09	8.56676	2.25963e-05	0.62215	Sc5Loc01715798.1	XP_020170757.1/3.1144e-97/GDSL esterase/lipase At5g55050-like [Aegilops tauschii subsp. tauschii]	ats:109762802/9e-16/LOC109762802; auxin transport protein BIG; K10691 E2 ubiquitin-protein ligase UBR4 [EC:2.3.2.27]	PTHR22835/3.5E-69/--	NA
PH	E1	FarmCPU	NewChr3rs271730674	3R	271730674	4.55175e-12	11.3418	3.79297e-08	-0.357432	NA	NA	NA	NA	NA
PH	E2	FarmCPU	NewChr4rs134791952	4R	134791952	5.6232e-08	7.25002	0.00023429	-1.12849	NA	NA	NA	NA	NA
PH	E1/E2	FarmCPU	NewChr4rs240293927	4R	240293927	8.51693e-10	9.06972	6.13475e-06	-11.9112	NA	NA	NA	NA	NA
PH	E2	FarmCPU	NewChr4rs287538752	4R	287538752	5.16057e-08	7.2873	0.000123905	0.802803	NA	NA	NA	NA	NA
PH	E3	FarmCPU	NewChr4rs37055247	4R	37055247	3.61459e-08	7.44194	0.000260359	-0.276511	NA	NA	NA	NA	NA
PH	E2	FarmCPU	NewChr6rs194814049	6R	194814049	6.9938e-08	7.15529	0.000251882	1.36135	NA	NA	NA	NA	NA
PH	E3	FarmCPU	NewChr6rs80905343	6R	80905343	3.87148e-09	8.41212	2.78862e-05	14.7602	NA	NA	NA	NA	NA
UIL	E1	FarmCPU	3Brs508522077	3B	508522077	1.07657e-10	9.96796	1.13002e-06	10.8779	TraesCS3B02G316600.1	CDM84075.1/0/unnamed protein product [Triticum aestivum]	LRR receptor-like serine/threonine-protein kinase FLS2	PTHR45183/8.9E-224/--	molecular_function:GO:0005515//protein binding;
										TraesCS3B02G316700.1	CDM84074.1/0/unnamed protein product [Triticum aestivum]	NA	PTHR13353:SF7/5.8E-147/--	cellular_component:GO:0016021//integral component of membrane;
										TraesCS3B02G316700.2	CDM84074.1/3.43374e-153/unnamed protein product [Triticum aestivum]	NA	PF01940/6.5E-26/Integral membrane protein DUF92	cellular_component:GO:0016021//integral component of membrane;
										TraesCS3B02G316800.1	XP_020183199.1/0/oil body-associated protein 2B-like [Aegilops tauschii subsp. tauschii]	NA	PF06884/1.1E-64/Protein of unknown function (DUF1264)	NA
UIL	E1	FarmCPU	4Brs201478359	4B	201478359	1.26394e-07	6.89827	0.000670329	14.1761	NA	NA	NA	NA	NA
UIL	E1	FarmCPU	5Ars56695198	5A	56695198	7.26967e-08	7.13849	0.000414807	4.74389	TraesCS5A02G058200.1	EMS67981.1/1.72987e-45/hypothetical protein TRIUR3_12175 [Triticum urartu]	NA	PTHR10795/4.4E-22/--	NA
										TraesCS5A02G058200.2	EMS67981.1/5.53789e-45/hypothetical protein TRIUR3_12175 [Triticum urartu]	NA	PTHR10795/5.5E-22/--	NA
UIL	E1	FarmCPU	6Ars258994609	6A	258994609	2.43906e-10	9.61278	2.15198e-06	-6.31917	NA	NA	NA	NA	NA
UIL	E1	FarmCPU	6Ars3762529	6A	3762529	8.55932e-10	9.06756	2.5173e-06	-12.4327	TraesCS6A02G009000.1	XP_020149488.1/0/bidirectional sugar transporter SWEET14-like [Aegilops tauschii subsp. tauschii] &gt;EMT20480.1 Protein RUPTURED POLLEN GRAIN 1 [Aegilops tauschii]	bidirectional sugar transporter SWEET14-like	PTHR10791:SF56/3.3E-138/--	cellular_component:GO:0016021//integral component of membrane;
										TraesCS6A02G009100.1	XP_020149490.1/0/bidirectional sugar transporter SWEET14-like [Aegilops tauschii subsp. tauschii]	bidirectional sugar transporter SWEET14-like	PTHR10791:SF56/2.1E-142/--	cellular_component:GO:0016021//integral component of membrane;
UIL	E1	FarmCPU	6Brs62687920	6B	62687920	1.88318e-09	8.72511	2.72214e-05	-0.354527	TraesCS6B02G086500.1	BAS02443.1/0/alpha/beta-gliadin [Triticum aestivum] &gt;BAS02452.1 alpha/beta-gliadin [Triticum aestivum] &gt;BAS02462.1 alpha/beta-gliadin [Triticum aestivum]	NA	PF13016/3.1E-12/Cys-rich Gliadin N-terminal	molecular_function:GO:0045735//nutrient reservoir activity;
										TraesCS6B02G086522.1
										TraesCS6B02G086600.1	XP_020146880.1/6.45637e-149/uncharacterized protein LOC109732096 [Aegilops tauschii subsp. tauschii]	NA	PF03087/1.0E-25/Arabidopsis protein of unknown function	NA
										TraesCS6B02G086700.1	XP_020146880.1/1.03368e-147/uncharacterized protein LOC109732096 [Aegilops tauschii subsp. tauschii]	NA	PF03087/1.0E-25/Arabidopsis protein of unknown function	NA
										TraesCS6B02G086800.1	XP_020146880.1/1.78878e-149/uncharacterized protein LOC109732096 [Aegilops tauschii subsp. tauschii]	NA	PTHR33070:SF22/2.3E-119/--	NA
										TraesCS6B02G086900.1	XP_020146793.1/7.76293e-138/uncharacterized protein LOC109732013 [Aegilops tauschii subsp. tauschii] &gt;EMT05419.1 hypothetical protein F775_01214 [Aegilops tauschii]	NA	PF03087/1.0E-28/Arabidopsis protein of unknown function	NA
										TraesCS6B02G087000.1	XP_020146668.1/4.57437e-130/uncharacterized protein LOC109731900 [Aegilops tauschii subsp. tauschii] &gt;EMT05420.1 hypothetical protein F775_01215 [Aegilops tauschii]	NA	PTHR33070:SF22/1.8E-114/--	NA
UIL	E1	FarmCPU	NewChr3rs240638184	3R	240638184	8.89529e-08	7.05084	0.000178766	1.91682	NA	NA	NA	NA	NA
UIL	E1	FarmCPU	NewChr3rs253478863	3R	253478863	1.2568e-07	6.90073	0.000595094	1.50566	NA	NA	NA	NA	NA
UIL	E1	FarmCPU	NewChr3rs78669899	3R	78669899	5.86021e-08	7.23209	0.00013874	-15.1358	NA	NA	NA	NA	NA
SL	E2	FarmCPU	1Brs356235638	1B	356235638	6.00649e-08	7.22138	0.000549564	10.4485	TraesCS1B02G198000.1	XP_020149220.1/0/plant UBX domain-containing protein 10 [Aegilops tauschii subsp. tauschii]	FAS-associated factor 2	PF00789/7.1E-19/UBX domain	molecular_function:GO:0005515//protein binding;
										TraesCS1B02G198100.1	XP_020149219.1/0/uncharacterized protein LOC109734420 [Aegilops tauschii subsp. tauschii]	NA	PF12937/5.2E-6/F-box-like	molecular_function:GO:0005515//protein binding;
SL	E1	FarmCPU	2Ars108018677	2A	108018677	1.63303e-08	7.78701	3.59817e-05	14.7945	TraesCS2A02G159800.1	XP_020175454.1/7.87744e-145/B3 domain-containing protein Os06g0194400-like [Aegilops tauschii subsp. tauschii] &gt;XP_020175455.1 B3 domain-containing protein Os06g0194400-like [Aegilops tauschii subsp. tauschii]	ubiquitin fusion degradation protein 1	PTHR31391:SF4/2.4E-55/--	molecular_function:GO:0003677//DNA binding;
SL	E1	FarmCPU	2Ars281452602	2A	281452602	1.0732e-10	9.96932	2.01687e-06	22.4582	NA	NA	NA	NA	NA
SL	E2	FarmCPU	2Ars477523182	2A	477523182	1.30153e-08	7.88555	3.59817e-05	9.84422	NA	NA	NA	NA	NA
SL	E2	FarmCPU	2Ars68797869	2A	68797869	1.30153e-08	7.88555	3.59817e-05	9.84422	TraesCS2A02G118100.1	XP_020192382.1/0/zinc finger CCCH domain-containing protein 10-like [Aegilops tauschii subsp. tauschii]	zinc finger CCCH domain-containing protein 2-like; K23047 E2 ubiquitin-protein ligase UNKL [EC:2.3.2.27]	PTHR14493:SF74/3.1E-56/--	NA
SL	E1	FarmCPU	2Brs101055167	2B	101055167	8.72365e-08	7.0593	0.00033183	-10.4461	TraesCS2B02G134600.1	EMT18247.1/0/hypothetical protein F775_21943 [Aegilops tauschii]	NA	PTHR33065/3.9E-143/--	NA
SL	E1	FarmCPU	2Brs394341711	2B	394341711	1.09965e-07	6.95874	0.000348572	-8.00161	TraesCS2B02G286300.1	XP_020152666.1/1.47495e-119/uncharacterized protein LOC109737965 [Aegilops tauschii subsp. tauschii] &gt;XP_020163551.1 uncharacterized protein LOC109748963 [Aegilops tauschii subsp. tauschii]	NA	PTHR33083:SF41/5.8E-56/--	NA
										TraesCS2B02G286400.1	XP_020152667.1/0/potassium transporter 22-like [Aegilops tauschii subsp. tauschii]	KUP system potassium uptake protein	PTHR30540/0.0/--	biological_process:GO:0071805//potassium ion transmembrane transport;cellular_component:GO:0016020//membrane;molecular_function:GO:0015079//potassium ion transmembrane transporter activity;
SL	E1	FarmCPU	2Brs555605101	2B	555605101	3.55545e-08	7.44911	0.000380391	1.48234	NA	NA	NA	NA	NA
SL	E1	FarmCPU	3Ars113401213	3A	113401213	2.06682e-09	8.6847	2.59489e-05	0.650867	TraesCS3A02G135800.1	CDM82038.1/0/unnamed protein product [Triticum aestivum]	solute carrier family 25	PTHR24089:SF427/7.3E-146/--	biological_process:GO:0055085//transmembrane transport;
										TraesCS3A02G135900.1	CDM86129.1/5.78074e-60/unnamed protein product [Triticum aestivum]	NA	PS50863/11.561/B3 DNA-binding domain profile.	molecular_function:GO:0003677//DNA binding;
SL	E1	FarmCPU	3Ars34464998	3A	34464998	1.25777e-07	6.9004	0.000590869	-15.0252	NA	NA	NA	NA	NA
SL	E1	FarmCPU	3Ars95504101	3A	95504101	4.885e-09	8.31114	5.48101e-05	-0.378919	TraesCS3A02G121300.2	XP_020153847.1/2.73839e-146/auxin-responsive protein IAA1-like [Aegilops tauschii subsp. tauschii]	auxin-responsive protein IAA	PTHR31734:SF86/1.8E-100/--	biological_process:GO:0006355//regulation of transcription, DNA-templated;cellular_component:GO:0005634//nucleus;molecular_function:GO:0005515//protein binding;
										TraesCS3A02G121400.1	XP_020175336.1/0/serine/threonine protein phosphatase 2A 57 kDa regulatory subunit B&apos; iota isoform-like [Aegilops tauschii subsp. tauschii]	serine/threonine-protein phosphatase 2A regulatory subunit B'	PF01603/2.2E-171/Protein phosphatase 2A regulatory B subunit (B56 family)	biological_process:GO:0007165//signal transduction;cellular_component:GO:0000159//protein phosphatase type 2A complex;molecular_function:GO:0019888//protein phosphatase regulator activity;
										TraesCS3A02G121500.1	CDM81821.1/0/unnamed protein product [Triticum aestivum]	NA	PTHR13353/6.9E-180/--	cellular_component:GO:0016021//integral component of membrane;
										TraesCS3A02G121600.1	EMS52065.1/0/hypothetical protein TRIUR3_08265 [Triticum urartu]	tudor domain-containing protein 3	PTHR13681:SF24/3.9E-86/--	NA
										TraesCS3A02G121600.3	EMS52065.1/0/hypothetical protein TRIUR3_08265 [Triticum urartu]	K18404 tudor domain-containing protein 3	PTHR13681:SF24/6.6E-86/--	NA
										TraesCS3A02G121700.1	XP_020175340.1/0/uncharacterized protein LOC109760966 [Aegilops tauschii subsp. tauschii]	cytochrome c oxidase assembly protein subunit 19	PTHR31169:SF5/2.7E-146/--	NA
SL	E2	FarmCPU	5Ars702481181	5A	702481181	2.75414e-09	8.56001	3.14302e-05	-5.33472	TraesCS5A02G548300.1	NP_001151015.1/9.5091e-36/glucan endo-1,3-beta-glucosidase 1 precursor [Zea mays] &gt;ACG41293.1 glucan endo-1,3-beta-glucosidase 1 precursor [Zea mays] &gt;ACR36200.1 unknown [Zea mays] &gt;ONM37692.1 PLASMODESMATA CALLOSE-BINDING PROTEIN 2 [Zea mays]	1,3-beta-glucanosyltransferase GAS1	PTHR32227/9.8E-32/--	NA
										TraesCS5A02G548400.1	XP_020196613.1/1.05475e-163/vacuolar protein sorting-associated protein 24 homolog 1-like [Aegilops tauschii subsp. tauschii]	charged multivesicular body protein 3	PTHR10476/2.2E-117/--	biological_process:GO:0007034//vacuolar transport;
										TraesCS5A02G548500.1	XP_020196614.1/0/xyloglucan endotransglucosylase/hydrolase protein 31-like [Aegilops tauschii subsp. tauschii]	xyloglucosyl transferase	PTHR31062:SF57/1.2E-161/--	biological_process:GO:0006073//cellular glucan metabolic process;GO:0005975//carbohydrate metabolic process;cellular_component:GO:0048046//apoplast;GO:0005618//cell wall;molecular_function:GO:0016762//xyloglucan:xyloglucosyl transferase activity;GO:0004553//hydrolase activity, hydrolyzing O-glycosyl compounds;
										TraesCS5A02G548600.2	XP_020196615.1/0/metacaspase-1-like [Aegilops tauschii subsp. tauschii]	metacaspase-1	PF00656/2.8E-45/Caspase domain	NA
SL	E3	FarmCPU	7Ars225752856	7A	225752856	5.34752e-10	9.27185	5.76329e-06	-2.14405	NA	NA	NA	NA	NA
SL	E1/E2	FarmCPU	7Ars28502318	7A	28502318	9.30219e-08	7.03141	0.000668362	9.32405	TraesCS7A02G058700.1	XP_020158062.1/0/uncharacterized protein LOC109743387 [Aegilops tauschii subsp. tauschii] &gt;XP_020158063.1 uncharacterized protein LOC109743387 [Aegilops tauschii subsp. tauschii] &gt;XP_020158064.1 uncharacterized protein LOC109743387 [Aegilops tauschii subsp. tauschii] &gt;XP_020158065.1 uncharacterized protein LOC109743387 [Aegilops tauschii subsp. tauschii]	speckle-type POZ protein	PTHR36072/4.7E-102/--	NA
										TraesCS7A02G058800.1	CDM80337.1/0/unnamed protein product [Triticum aestivum]	LRR receptor-like serine/threonine-protein kinase FLS2	PS51450/5.633/Leucine-rich repeat profile.	molecular_function:GO:0005515//protein binding;
										TraesCS7A02G058900.1	XP_020153253.1/5.2179e-165/putative receptor-like protein kinase At3g47110 isoform X2 [Aegilops tauschii subsp. tauschii]	brassinosteroid LRR receptor kinase BRI1	PTHR43887:SF15/8.1E-172/--	biological_process:GO:0006468//protein phosphorylation;molecular_function:GO:0005524//ATP binding;GO:0004672//protein kinase activity;
										TraesCS7A02G059000.1	XP_020158067.1/0/scarecrow-like protein 28 [Aegilops tauschii subsp. tauschii]	DELLA protein DWARF8-like	PTHR31636:SF16/2.5E-229/--	NA
SL	E2	FarmCPU	7Ars6298801	7A	6298801	1.54298e-08	7.81164	0.00033259	0.630874	TraesCS7A02G013600.1	EMS61047.1/0/Receptor-like protein kinase HAIKU2 [Triticum urartu]	receptor-like protein kinase 5	PS50011/27.015/Protein kinase domain profile.	biological_process:GO:0006468//protein phosphorylation;molecular_function:GO:0005524//ATP binding;GO:0004672//protein kinase activity;
										TraesCS7A02G013700.1	XP_020179692.1/0/wall-associated receptor kinase 2-like [Aegilops tauschii subsp. tauschii]	wall-associated receptor kinase 2-like	PS01187/-/Calcium-binding EGF-like domain signature.	biological_process:GO:0006468//protein phosphorylation;molecular_function:GO:0005524//ATP binding;GO:0030247//polysaccharide binding;GO:0005509//calcium ion binding;GO:0004672//protein kinase activity;
SL	E2	FarmCPU	7Brs114212017	7B	114212017	7.6198e-11	10.1181	1.61182e-06	1.35273	TraesCS7B02G099900.1	XP_020193297.1/0/putative xyloglucan endotransglucosylase/hydrolase protein 1 [Aegilops tauschii subsp. tauschii] &gt;EMT32589.1 Putative xyloglucan endotransglucosylase/hydrolase protein 1 [Aegilops tauschii]	xyloglucan endotransglucosylase/hydrolase protein 1 precursor	PS51762/25.669/Glycosyl hydrolases family 16 (GH16) domain profile.	biological_process:GO:0006073//cellular glucan metabolic process;GO:0005975//carbohydrate metabolic process;cellular_component:GO:0048046//apoplast;GO:0005618//cell wall;molecular_function:GO:0016762//xyloglucan:xyloglucosyl transferase activity;GO:0004553//hydrolase activity, hydrolyzing O-glycosyl compounds;
										TraesCS7B02G100000.1	XP_020193305.1/0/protein NLRC3 isoform X1 [Aegilops tauschii subsp. tauschii]	NLR family CARD domain-containing protein 3	PTHR44483/8.4E-99/--	molecular_function:GO:0005515//protein binding;
SL	E2	FarmCPU	7Brs123893493	7B	123893493	6.13016e-10	9.21253	6.48357e-06	1.50577	TraesCS7B02G107400.1	XP_020181375.1/0/MACPF domain-containing protein At1g14780-like isoform X2 [Aegilops tauschii subsp. tauschii]	class III chitinase	PS51412/20.874/Membrane attack complex/perforin (MACPF) domain profile.	NA
										TraesCS7B02G107500.1	XP_020181376.1/0/microtubule-associated protein 70-3 [Aegilops tauschii subsp. tauschii]	magnesium transporter	PTHR31246/0.0/--	biological_process:GO:0007010//cytoskeleton organization;molecular_function:GO:0008017//microtubule binding;
SL	E2	FarmCPU	7Brs123970851	7B	123970851	1.18389e-09	8.92669	2.50429e-05	-6.99177	TraesCS7B02G107600.1	EMT25321.1/9.92219e-109/hypothetical protein F775_02927 [Aegilops tauschii]	NA	NA	NA
SL	E2	FarmCPU	7Brs220446305	7B	220446305	1.57783e-10	9.80194	3.33759e-06	-1.62534	TraesCS7B02G161400.1	XP_020177460.1/4.98447e-97/uncharacterized protein LOC109762998 [Aegilops tauschii subsp. tauschii]	NA	PTHR33326:SF4/7.6E-23/--	NA
SL	E1	FarmCPU	7Brs26949357	7B	26949357	1.98926e-08	7.70131	0.000420789	-0.252934	NA	NA	NA	NA	NA
SL	E2	FarmCPU	7Brs295858274	7B	295858274	3.51072e-17	16.4546	7.42624e-13	-1.35274	NA	NA	NA	NA	NA
SL	E1	FarmCPU	NewChr2rs188110769	2R	188110769	1.83283e-10	9.73688	1.32018e-06	-0.510127	NA	NA	NA	NA	NA
SL	E1	FarmCPU	NewChr2rs214691189	2R	214691189	8.66547e-09	8.06221	1.74147e-05	-0.227992	NA	NA	NA	NA	NA
SL	E1	FarmCPU	NewChr2rs233638021	2R	233638021	1.04133e-08	7.98241	6.27818e-05	-7.33942	Sc2Loc00040176.1	CDJ26561.1/1.57015e-39/unnamed protein product [Triticum aestivum]	NA	PTHR43731:SF4/2.2E-44/--	cellular_component:GO:0016021//integral component of membrane;molecular_function:GO:0004252//serine-type endopeptidase activity;
SL	E2	FarmCPU	NewChr5rs217747858	5R	217747858	1.70043e-09	8.76944	1.02519e-05	-10.7414	NA	NA	NA	NA	NA
SL	E2	FarmCPU	NewChr5rs290442898	5R	290442898	4.21079e-09	8.37564	1.26934e-05	-0.447112	NA	NA	NA	NA	NA
SNS	E2	FarmCPU	1Ars133889525	1A	133889525	2.8982e-08	7.53787	0.000200614	-0.260739	NA	NA	NA	NA	NA
SNS	E2	FarmCPU	2Ars189775262	2A	189775262	5.63317e-12	11.2492	1.05864e-07	-9.7463	NA	NA	NA	NA	NA
SNS	E2	FarmCPU	2Ars212228072	2A	212228072	2.83161e-08	7.54797	0.000266072	-17.4326	NA	NA	NA	NA	NA
SNS	E2	FarmCPU	2Ars269329230	2A	269329230	2.85683e-09	8.54412	5.36884e-05	-7.03341	NA	NA	NA	NA	NA
SNS	E2	FarmCPU	2Ars269329265	2A	269329265	1.21427e-07	6.91569	0.000734324	6.75611	NA	NA	NA	NA	NA
SNS	E2	FarmCPU	2Ars269329308	2A	269329308	9.52178e-12	11.0213	1.78943e-07	1.71251	NA	NA	NA	NA	NA
SNS	E2	FarmCPU	2Ars269329355	2A	269329355	1.33184e-09	8.87555	2.50294e-05	2.27241	NA	NA	NA	NA	NA
SNS	E2	FarmCPU	2Ars269329384	2A	269329384	4.63693e-08	7.33377	0.000435709	8.59881	NA	NA	NA	NA	NA
SNS	E2	FarmCPU	2Ars269329398	2A	269329398	5.33825e-09	8.2726	5.01609e-05	14.0273	NA	NA	NA	NA	NA
SNS	E2	FarmCPU	2Ars282079475	2A	282079475	1.50428e-08	7.82267	0.00014135	13.4697	NA	NA	NA	NA	NA
SNS	E2	FarmCPU	2Ars291538025	2A	291538025	5.94492e-14	13.2259	1.11723e-09	-15.0344	NA	NA	NA	NA	NA
SNS	E2	FarmCPU	2Ars291538229	2A	291538229	1.62579e-09	8.78894	3.05534e-05	11.5053	NA	NA	NA	NA	NA
SNS	E2	FarmCPU	2Ars378768935	2A	378768935	4.35267e-12	11.3612	8.17997e-08	16.1842	TraesCS2A02G250700.1	EMS58208.1/1.11999e-76/hypothetical protein TRIUR3_02272 [Triticum urartu]	NA	NA	NA
SNS	E3	FarmCPU	2Ars739449725	2A	739449725	2.57553e-08	7.58913	0.00024201	-1.30416	TraesCS2A02G515000.1	XP_020171715.1/0/BRCA1-associated protein-like [Aegilops tauschii subsp. tauschii]	BRCA1-associated protein	PTHR24007/2.4E-254/--	biological_process:GO:0016567//protein ubiquitination;GO:0010029//regulation of seed germination;cellular_component:GO:0000151//ubiquitin ligase complex;molecular_function:GO:0008270//zinc ion binding;GO:0004842//ubiquitin-protein transferase activity;
										TraesCS2A02G515100.1	EMT13466.1/0/LRR receptor-like serine/threonine-protein kinase GSO1 [Aegilops tauschii]	LRR receptor-like serine/threonine-protein kinase FLS2	PTHR27004:SF21/1.1E-195/--	molecular_function:GO:0005515//protein binding;
										TraesCS2A02G515200.1	BAK05063.1/2.96491e-81/predicted protein [Hordeum vulgare subsp. vulgare]	BRCA1-associated protein-like	PD017029/8.0E-37/ZINC METAL-BINDING ZINC-FINGER NUCLEAR FINGER RING CHROMOSOME BRAP2 IMP YHL010C	biological_process:GO:0016567//protein ubiquitination;GO:0010029//regulation of seed germination;cellular_component:GO:0000151//ubiquitin ligase complex;molecular_function:GO:0004842//ubiquitin-protein transferase activity;
										TraesCS2A02G515300.1	EMS54276.1/1.61591e-162/Transcription factor ORG2 [Triticum urartu]	Transcription factor ORG2	PS50888/13.814/Myc-type, basic helix-loop-helix (bHLH) domain profile.	biological_process:GO:0006357//regulation of transcription from RNA polymerase II promoter;molecular_function:GO:0003677//DNA binding;GO:0046983//protein dimerization activity;
										TraesCS2A02G515300.2	EMS54276.1/5.46364e-163/Transcription factor ORG2 [Triticum urartu]	Transcription factor ORG2	PS50888/13.814/Myc-type, basic helix-loop-helix (bHLH) domain profile.	biological_process:GO:0006357//regulation of transcription from RNA polymerase II promoter;molecular_function:GO:0003677//DNA binding;GO:0046983//protein dimerization activity;
SNS	E1	FarmCPU	2Brs740734755	2B	740734755	5.20415e-08	7.28365	0.000197956	7.98644	TraesCS2B02G542800.1	EAY78582.1/5.87402e-128/hypothetical protein OsI_33679 [Oryza sativa Indica Group] &gt;EEE40687.1 hypothetical protein OsJ_30945 [Oryza sativa Japonica Group] &gt;BAF26570.2 Os10g0429300 [Oryza sativa Japonica Group] &gt;BAT10942.1 Os10g0429300 [Oryza sativa Japonica Group]	speckle-type POZ protein	PS50097/15.06/BTB domain profile.	molecular_function:GO:0005515//protein binding;
										TraesCS2B02G542900.1	XP_020200186.1/0/crossover junction endonuclease EME1-like isoform X2 [Aegilops tauschii subsp. tauschii]	crossover junction endonuclease EME1	PTHR21077/2.6E-104/--	biological_process:GO:0006281//DNA repair;cellular_component:GO:0005634//nucleus;GO:0048476//Holliday junction resolvase complex;molecular_function:GO:0003677//DNA binding;GO:0004518//nuclease activity;
SNS	E1	FarmCPU	2Brs93293450	2B	93293450	4.00011e-08	7.39793	0.000380391	-1.55103	NA	NA	NA	NA	NA
SNS	E2	FarmCPU	3Ars267621694	3A	267621694	9.9009e-08	7.00433	0.00186048	7.8941	NA	NA	NA	NA	NA
SNS	E2	FarmCPU	3Ars267621819	3A	267621819	4.95629e-09	8.30484	9.31336e-05	11.9301	NA	NA	NA	NA	NA
SNS	E3	FarmCPU	3Ars282778551	3A	282778551	9.49641e-10	9.02244	8.92235e-06	1.91657	NA	NA	NA	NA	NA
SNS	E2	FarmCPU	3Ars354167528	3A	354167528	5.83366e-09	8.23406	5.48101e-05	-0.355576	NA	NA	NA	NA	NA
SNS	E2	FarmCPU	3Ars657178818	3A	657178818	1.88074e-09	8.72567	3.5341e-05	-0.357285	NA	NA	NA	NA	NA
SNS	E2	FarmCPU	3Ars90482805	3A	90482805	2.76184e-09	8.5588	2.59489e-05	0.90496	NA	NA	NA	NA	NA
SNS	E2	FarmCPU	3Brs276242073	3B	276242073	6.11799e-08	7.21339	0.000642174	6.14795	NA	NA	NA	NA	NA
SNS	E2	FarmCPU	4Ars19729127	4A	19729127	1.09468e-07	6.96071	0.00211843	1.11303	NA	NA	NA	NA	NA
SNS	E1	FarmCPU	4Ars218697167	4A	218697167	1.08087e-09	8.96623	2.09169e-05	11.2801	NA	NA	NA	NA	NA
SNS	E2	FarmCPU	4Ars235322082	4A	235322082	1.19612e-07	6.92222	0.000846337	1.28236	NA	NA	NA	NA	NA
SNS	E1	FarmCPU	4Ars689035883	4A	689035883	6.49867e-08	7.18718	0.00125762	0.251212	NA	NA	NA	NA	NA
SNS	E1	FarmCPU	5Ars397705032	5A	397705032	8.6327e-10	9.06385	4.92582e-06	7.44792	TraesCS5A02G194300.1	XP_020184410.1/0/aminopeptidase M1-C-like isoform X1 [Aegilops tauschii subsp. tauschii]	puromycin-sensitive aminopeptidase	PR00756/3.4E-29/Membrane alanyl dipeptidase (M1) family signature	biological_process:GO:0006508//proteolysis;molecular_function:GO:0008237//metallopeptidase activity;GO:0008270//zinc ion binding;
SNS	E2	FarmCPU	5Ars494382195	5A	494382195	3.72982e-08	7.42831	0.000106412	8.38379	TraesCS5A02G286500.1	ABR20128.1/0/asynapsis 1 [Triticum aestivum]	CTD small phosphatase-like protein 2	PS50815/35.841/HORMA domain profile.	NA
										TraesCS5A02G286600.1	XP_020148857.1/0/TITAN-like protein [Aegilops tauschii subsp. tauschii] &gt;XP_020148858.1 TITAN-like protein [Aegilops tauschii subsp. tauschii] &gt;XP_020148859.1 TITAN-like protein [Aegilops tauschii subsp. tauschii] &gt;XP_020148860.1 TITAN-like protein [Aegilops tauschii subsp. tauschii] &gt;XP_020148861.1 TITAN-like protein [Aegilops tauschii subsp. tauschii]	NA	PF14968/4.5E-114/Coiled coil protein 84	NA
SNS	E3	FarmCPU	5Ars555155945	5A	555155945	4.74494e-09	8.32377	5.41493e-05	-0.331602	NA	NA	NA	NA	NA
SNS	E3	FarmCPU	5Ars559286948	5A	559286948	1.62518e-10	9.7891	9.2733e-07	13.1508	NA	NA	NA	NA	NA
SNS	E3	FarmCPU	5Ars668976112	5A	668976112	1.21524e-07	6.91534	0.000462276	1.00036	NA	NA	NA	NA	NA
SNS	E1	FarmCPU	5Ars696557711	5A	696557711	4.28748e-10	9.3678	4.89287e-06	-5.52119	NA	NA	NA	NA	NA
SNS	E1	FarmCPU	6Brs32677406	6B	32677406	1.05954e-07	6.97488	0.00153157	0.271715	NA	NA	NA	NA	NA
SNS	E1	FarmCPU	6Brs508970730	6B	508970730	4.48001e-09	8.34872	3.23793e-05	13.9206	TraesCS6B02G282500.1	XP_020184573.1/1.293e-175/probable WRKY transcription factor 12 [Aegilops tauschii subsp. tauschii]	WRKY transcription factor WRKY24;WRKY transcription factor 33	PS50811/28.908/WRKY domain profile.	biological_process:GO:0006355//regulation of transcription, DNA-templated;molecular_function:GO:0043565//sequence-specific DNA binding;GO:0003700//DNA binding transcription factor activity;
SNS	E1	FarmCPU	6Brs567771698	6B	567771698	5.46012e-08	7.2628	0.000197315	6.73142	TraesCS6B02G320500.1	XP_020155825.1/0/FBD-associated F-box protein At5g60610-like [Aegilops tauschii subsp. tauschii]	NA	PTHR43988/8.9E-174/--	molecular_function:GO:0005515//protein binding;
										TraesCS6B02G320600.1	BAK00967.1/7.10292e-132/predicted protein [Hordeum vulgare subsp. vulgare]	serine/threonine-protein phosphatase 6 regulatory ankyrin repeat subunit A-like isoform X2	PTHR24177:SF111/1.5E-61/--	molecular_function:GO:0005515//protein binding;
										TraesCS6B02G320700.1	XP_020155833.1/0/F-box/FBD/LRR-repeat protein At1g13570-like [Aegilops tauschii subsp. tauschii]	NA	PTHR43988:SF7/1.9E-191/--	molecular_function:GO:0005515//protein binding;
SNS	E1	FarmCPU	7Ars184678809	7A	184678809	2.07212e-08	7.68358	0.000223323	14.9995	TraesCS7A02G218000.1	XP_020184924.1/0/protein ENHANCED DOWNY MILDEW 2-like isoform X2 [Aegilops tauschii subsp. tauschii] &gt;XP_020184925.1 protein ENHANCED DOWNY MILDEW 2-like isoform X2 [Aegilops tauschii subsp. tauschii]	peptidyl-prolyl isomerase G (cyclophilin G)	SM00249/0.12/--	NA
SNS	E1	FarmCPU	7Ars291351602	7A	291351602	1.10284e-07	6.95749	0.00191338	12.8491	NA	NA	NA	NA	NA
SNS	E1	FarmCPU	7Ars724790754	7A	724790754	8.61821e-10	9.06458	1.85765e-05	-0.79712	NA	NA	NA	NA	NA
SNS	E1	FarmCPU	7Brs27494965	7B	27494965	1.50673e-09	8.82197	1.59359e-05	21.9547	TraesCS7B02G029000.1	XP_020165287.1/1.09888e-88/auxin-responsive protein IAA20-like [Aegilops tauschii subsp. tauschii] &gt;XP_020152472.1 auxin-responsive protein IAA20-like [Aegilops tauschii subsp. tauschii]	auxin-responsive protein IAA20-like; K14484 auxin-responsive protein IAA	PS51745/25.892/PB1 domain profile.	biological_process:GO:0006355//regulation of transcription, DNA-templated;cellular_component:GO:0005634//nucleus;molecular_function:GO:0005515//protein binding;
SNS	E1	FarmCPU	7Brs611985063	7B	611985063	2.65732e-08	7.57556	0.000281052	7.52527	TraesCS7B02G354100.1	XP_002456845.1/0/polyubiquitin [Sorghum bicolor] &gt;XP_007695807.1 hypothetical protein COCSADRAFT_108224 [Bipolaris sorokiniana ND90Pr] &gt;XP_009412666.1 PREDICTED: polyubiquitin [Musa acuminata subsp. malaccensis] &gt;XP_014081015.1 hypothetical protein COCC4DRAFT_70576 [Bipolaris maydis ATCC 48331] &gt;XP_014557629.1 hypothetical protein COCVIDRAFT_96666 [Bipolaris victoriae FI3] &gt;XP_0200…	ubiquitin C	PTHR10666/1.6E-223/--	molecular_function:GO:0005515//protein binding;
SNS	E1	FarmCPU	NewChr1rs122212247	1R	122212247	1.52274e-09	8.81737	3.0602e-06	-1.33402	Sc1Loc01952146.8	XP_020174216.1/0/CTP synthase-like [Aegilops tauschii subsp. tauschii] &gt;EMT05976.1 CTP synthase [Aegilops tauschii]	CTP synthase	PS51273/22.148/Glutamine amidotransferase type 1 domain profile.	biological_process:GO:0006221//pyrimidine nucleotide biosynthetic process;molecular_function:GO:0003883//CTP synthase activity;
SNS	E3	FarmCPU	NewChr1rs182690357	1R	182690357	2.85364e-08	7.5446	8.60229e-05	10.6223	NA	NA	NA	NA	NA
SNS	E1	FarmCPU	NewChr1rs99358523	1R	99358523	1.22319e-07	6.91251	0.000368731	-7.27184	NA	NA	NA	NA	NA
SNS	E3	FarmCPU	NewChr2rs166320822	2R	166320822	2.09834e-12	11.6781	1.26509e-08	2.45937	NA	NA	NA	NA	NA
SNS	E3	FarmCPU	NewChr2rs251275967	2R	251275967	1.15729e-07	6.93656	0.000697732	3.62353	NA	NA	NA	NA	NA
SNS	E1	FarmCPU	NewChr3rs137664497	3R	137664497	1.18549e-08	7.9261	7.1473e-05	6.60312	Sc3Loc01459052.2	EMT28633.1/0/Peptide transporter PTR5 [Aegilops tauschii]	solute carrier family 15 (peptide/histidine transporter)	PTHR11654:SF76/2.8E-234/--	biological_process:GO:0055085//transmembrane transport;cellular_component:GO:0016020//membrane;molecular_function:GO:0022857//transmembrane transporter activity;
SNS	E1	FarmCPU	NewChr3rs208918505	3R	208918505	7.28841e-10	9.13737	4.39418e-06	2.86297	NA	NA	NA	NA	NA
SNS	E1	FarmCPU	NewChr3rs296816363	3R	296816363	1.48072e-08	7.82953	4.46362e-05	-3.89252	NA	NA	NA	NA	NA
SNS	E1	FarmCPU	NewChr3rs48444877	3R	48444877	2.50407e-09	8.60135	1.5097e-05	10.7418	NA	NA	NA	NA	NA
SNS	E1	FarmCPU	NewChr4rs130796768	4R	130796768	6.70101e-08	7.17386	0.000404004	1.84202	Sc4Loc01332516.1	EMT32771.1/2.86248e-79/NAC domain-containing protein 43 [Aegilops tauschii]	NA	NA	NA
SNS	E1	FarmCPU	NewChr5rs207504297	5R	207504297	4.25017e-08	7.37159	6.40607e-05	1.47144	Sc5Loc01328920.1	XP_020191332.1/1.64383e-34/HMG1/2-like protein [Aegilops tauschii subsp. tauschii]	high mobility group protein B3	PTHR13711/4.8E-19/--	NA
GNS	E1	FarmCPU	2Ars284072549	2A	284072549	8.08383e-10	9.09238	1.51919e-05	-0.767734	NA	NA	NA	NA	NA
GNS	E1	FarmCPU	2Ars502773723	2A	502773723	2.39166e-08	7.6213	0.000224732	-7.09741	NA	NA	NA	NA	NA
GNS	E1	FarmCPU	3Brs287527518	3B	287527518	5.25644e-09	8.27931	3.67828e-05	-17.0995	NA	NA	NA	NA	NA
GNS	E1	FarmCPU	3Brs593695038	3B	593695038	1.25941e-12	11.8998	2.64389e-08	-9.03287	NA	NA	NA	NA	NA
GNS	E2	FarmCPU	5Ars691683144	5A	691683144	1.4512e-11	10.8383	1.65612e-07	9.56072	TraesCS5A02G534200.1	XP_020177106.1/0/AT-hook motif nuclear-localized protein 1-like [Aegilops tauschii subsp. tauschii]	zinc finger CCCH domain-containing protein 30-like; K23047 E2 ubiquitin-protein ligase UNKL	NA	NA
										TraesCS5A02G534300.1	CAM58986.1/0/beta tubulin 8 [Hordeum vulgare subsp. vulgare] &gt;BAK00571.1 predicted protein [Hordeum vulgare subsp. vulgare] &gt;EMS50212.1 Tubulin beta-2 chain [Triticum urartu]	tubulin beta	NA	biological_process:GO:0007017//microtubule-based process;cellular_component:GO:0005874//microtubule;molecular_function:GO:0005525//GTP binding;GO:0005200//structural constituent of cytoskeleton;GO:0003924//GTPase activity;
										TraesCS5A02G534400.1	EMS50213.1/0/Transcription factor RAX2 [Triticum urartu]	transcription factor RAX2-like	NA	NA
GNS	E2	FarmCPU	6Ars584953678	6A	584953678	1.17263e-09	8.93084	1.03462e-05	-1.70026	TraesCS6A02G352200.1	XP_020171010.1/0/RING-H2 finger protein ATL13-like [Aegilops tauschii subsp. tauschii] &gt;XP_020175805.1 RING-H2 finger protein ATL13-like [Aegilops tauschii subsp. tauschii]	RING-H2 finger protein ATL13-like isoform X1; K19041 E2 ubiquitin-protein ligase RNF38/44	NA	NA
										TraesCS6A02G352300.1	XP_020171009.1/0/probable E2 ubiquitin-protein ligase XBOS32 [Aegilops tauschii subsp. tauschii]	E2 ubiquitin-protein ligase XBOS32	NA	molecular_function:GO:0005515//protein binding;
										TraesCS6A02G352400.1	EMS47975.1/2.47837e-61/putative E2 ubiquitin-protein ligase XBOS32 [Triticum urartu]	U4/U6.U5 small nuclear ribonucleoprotein 27 kDa protein	NA	biological_process:GO:0008380//RNA splicing;
										TraesCS6A02G352500.1	EMT09372.1/3.90679e-76/hypothetical protein F775_01139 [Aegilops tauschii]	NA	NA	NA
										TraesCS6A02G352600.1	EMT09373.1/0/Lectin-domain containing receptor kinase A4.3 [Aegilops tauschii]	L-type lectin-domain containing receptor kinase	NA	biological_process:GO:0006468//protein phosphorylation;molecular_function:GO:0030246//carbohydrate binding;GO:0005524//ATP binding;GO:0004672//protein kinase activity;
										TraesCS6A02G352700.1	EMS47973.1/0/L-type lectin-domain containing receptor kinase IV.1 [Triticum urartu]	L-type lectin-domain containing receptor kinase	PS00108/-/Serine/Threonine protein kinases active-site signature.	biological_process:GO:0006468//protein phosphorylation;molecular_function:GO:0030246//carbohydrate binding;GO:0005524//ATP binding;GO:0004672//protein kinase activity;
										TraesCS6A02G352800.1	XP_020170236.1/0/L-type lectin-domain containing receptor kinase IV.1-like [Aegilops tauschii subsp. tauschii]	interleukin-1 receptor-associated kinase	PF00069/1.4E-44/Protein kinase domain	biological_process:GO:0006468//protein phosphorylation;molecular_function:GO:0030246//carbohydrate binding;GO:0005524//ATP binding;GO:0004672//protein kinase activity;
										TraesCS6A02G352900.1	XP_020170236.1/0/L-type lectin-domain containing receptor kinase IV.1-like [Aegilops tauschii subsp. tauschii]	L-type lectin-domain containing receptor kinase	PTHR27007:SF28/0.0/--	biological_process:GO:0006468//protein phosphorylation;molecular_function:GO:0030246//carbohydrate binding;GO:0005524//ATP binding;GO:0004672//protein kinase activity;
SP	E1	FarmCPU	2Ars112237616	2A	112237616	4.46576e-08	7.3501	0.00083925	1.94435	NA	NA	NA	NA	NA
SP	E1	FarmCPU	2Ars467723751	2A	467723751	6.76216e-08	7.16991	0.000423604	9.32021	TraesCS2A02G280000.2	XP_020185780.1/2.39957e-144/ankyrin repeat and SAM domain-containing protein 6-like isoform X1 [Aegilops tauschii subsp. tauschii]	thj:104802662/2e-52/ankyrin repeat and SAM domain-containing protein 6-like isoform X1; K21878 Usher syndrome type-1G protein	PTHR23509/6.4E-49/--	molecular_function:GO:0005515//protein binding;
SP	E1	FarmCPU	2Ars477349907	2A	477349907	5.85659e-09	8.23236	0.000110063	14.5674	NA	NA	NA	NA	NA
SP	E1/E2	FarmCPU	3Brs458306736	3B	458306736	2.176e-08	7.66234	0.000228404	3.85973	TraesCS3B02G286500.1	CDM83670.1/0/unnamed protein product [Triticum aestivum]	ats:109785310/0.0/LOC109785310; myb-related protein Hv33-like; K09422 transcription factor MYB, plant	PS51294/16.843/Myb-type HTH DNA-binding domain profile.	NA
SP	E1	FarmCPU	3Brs636408113	3B	636408113	2.63592e-12	11.5791	5.53359e-08	15.4941	TraesCS3B02G401700.1	EMS59542.1/0/F-box/LRR-repeat protein 13 [Triticum urartu]	egr:104451286/2e-17/LOW QUALITY PROTEIN: L-ascorbate oxidase; K00423 L-ascorbate oxidase [EC:1.10.3.3]	PTHR31639/1.0E-110/--	molecular_function:GO:0005515//protein binding;
										TraesCS3B02G401800.2	XP_020180127.1/0/uncharacterized protein LOC109765741 isoform X2 [Aegilops tauschii subsp. tauschii]	ccav:112513125/8e-32/uncharacterized protein LOC112513125 isoform X1; K22267 starch-binding domain-containing protein 1	PTHR43447/1.1E-102/--	molecular_function:GO:2001070//starch binding;
										TraesCS3B02G401900.4	CDM85065.1/0/unnamed protein product [Triticum aestivum]	ats:109765731/0.0/LOC109765731; RNA polymerase II C-terminal domain phosphatase-like 2; K18998 RNA polymerase II C-terminal domain phosphatase-like 1/2 [EC:3.1.3.16]	PTHR23081:SF10/0.0/--	`
SP	E1/E3	FarmCPU	4Brs134161158	4B	134161158	9.37081e-08	7.02822	0.000496981	-3.50647	NA	NA	NA	NA	NA
SP	E1	FarmCPU	4Brs533875084	4B	533875084	1.62944e-08	7.78796	8.64174e-05	5.08233	NA	NA	NA	NA	NA
SP	E1/E3	FarmCPU	7Ars421807529	7A	421807529	1.10935e-10	9.95493	2.39121e-06	-10.5829	TraesCS7A02G301900.1	BAK02300.1/0/predicted protein [Hordeum vulgare subsp. vulgare]	ats:109771740/0.0/LOC109771740; DNA-directed RNA polymerase II subunit 1-like; K03006 DNA-directed RNA polymerase II subunit RPB1 [EC:2.7.7.6]	PS00115/-/Eukaryotic RNA polymerase II heptapeptide repeat.	biological_process:GO:0006351//transcription, DNA-templated;GO:0006366//transcription from RNA polymerase II promoter;cellular_component:GO:0005665//DNA-directed RNA polymerase II, core complex;molecular_function:GO:0003899//DNA-directed 5'-3' RNA polymerase activity;GO:0003677//DNA binding;
TGW	E1	FarmCPU	3Ars512931008	3A	512931008	3.20457e-09	8.49423	6.02172e-05	-0.813724	NA	NA	NA	NA	NA
TGW	E3	FarmCPU	4Brs21527976	4B	21527976	1.19769e-07	6.92166	0.000670329	13.5782	TraesCS4B02G029200.2	XP_020165778.1/0/heterogeneous nuclear ribonucleoprotein A2 homolog 1 isoform X1 [Aegilops tauschii subsp. tauschii]	caprin-1	PTHR37736/1.0E-121/--	NA
										TraesCS4B02G029300.1	XP_020165781.1/1.18926e-93/vegetative cell wall protein gp1-like [Aegilops tauschii subsp. tauschii]	NA	NA	NA
										TraesCS4B02G029400.1	XP_020165780.1/0/polygalacturonate 4-alpha-galacturonosyltransferase-like [Aegilops tauschii subsp. tauschii] &gt;EMT14751.1 Glycosyltransferase QUASIMODO1 [Aegilops tauschii]	alpha-1,4-galacturonosyltransferase	PF01501/5.9E-95/Glycosyl transferase family 8	molecular_function:GO:0047262//polygalacturonate 4-alpha-galacturonosyltransferase activity;GO:0016757//transferase activity, transferring glycosyl groups;
TGW	E1/E2	FarmCPU	4Brs422552894	4B	422552894	5.65707e-08	7.24741	0.000300022	4.79854	TraesCS4B02G196000.1	XP_020200432.1/0/uncharacterized protein LOC109786100 isoform X3 [Aegilops tauschii subsp. tauschii]	NA	PTHR34468:SF2/3.3E-125/--	NA
										TraesCS4B02G196100.1	XP_020200517.1/0/transmembrane protein 209 [Aegilops tauschii subsp. tauschii]	NA	PF09786/1.0E-188/Cytochrome B561, N terminal	NA
TGW	E1	FarmCPU	4Brs468155689	4B	468155689	1.69321e-09	8.77129	1.79599e-05	-15.4585	NA	NA	NA	NA	NA
TGW	E2	FarmCPU	4Brs619828483	4B	619828483	7.09518e-12	11.149	7.52586e-08	-18.2122	TraesCS4B02G328900.1	EMS60751.1/0/Putative NAC domain-containing protein 94 [Triticum urartu]	ferric-chelate reductase	PTHR31989/2.8E-130/--	biological_process:GO:0006355//regulation of transcription, DNA-templated;molecular_function:GO:0003677//DNA binding;
										TraesCS4B02G329000.1	CDM80608.1/3.30711e-179/unnamed protein product [Triticum aestivum]	exonuclease 3'-5' domain-containing protein 2	PTHR13620/3.5E-17/--	biological_process:GO:0006139//nucleobase-containing compound metabolic process;molecular_function:GO:0008408//3'-5' exonuclease activity;GO:0003676//nucleic acid binding;
TGW	E2	FarmCPU	4Brs651791210	4B	651791210	8.72065e-09	8.05945	9.24999e-05	5.58571	TraesCS4B02G362500.1	AEW90965.1/0/expansin B4 F5-1 [Secale cereale x Triticum turgidum subsp. durum]	expansin	PS50843/23.353/Expansin, Cellulose-binding-like domain profile.	biological_process:GO:0019953//sexual reproduction;cellular_component:GO:0005576//extracellular region;
										TraesCS4B02G362600.1	AEW90965.1/0/expansin B4 F5-1 [Secale cereale x Triticum turgidum subsp. durum]	expansin	PS50843/23.353/Expansin, Cellulose-binding-like domain profile.	biological_process:GO:0019953//sexual reproduction;cellular_component:GO:0005576//extracellular region;
TGW	E3	FarmCPU	5Ars515923481	5A	515923481	1.08462e-07	6.96472	0.000618882	-0.988639	NA	NA	NA	NA	NA
TGW	E3	FarmCPU	5Ars92261105	5A	92261105	7.45626e-08	7.12748	0.000743062	-0.646158	NA	NA	NA	NA	NA
TGW	E3	FarmCPU	5Brs347573796	5B	347573796	1.01316e-07	6.99432	0.000808956	1.14858	TraesCS5B02G192400.1	XP_020168866.1/6.68505e-160/glutathione S-transferase U18-like [Aegilops tauschii subsp. tauschii]	glutathione S-transferase	PS50405/13.852/Soluble glutathione S-transferase C-terminal domain profile.	molecular_function:GO:0005515//protein binding;
TGW	E3	FarmCPU	5Brs594462289	5B	594462289	7.62927e-08	7.11752	0.000406106	-13.183	NA	NA	NA	NA	NA
TGW	E3	FarmCPU	5Brs82360063	5B	82360063	1.00103e-09	8.99955	1.59855e-05	-5.00954	NA	NA	NA	NA	NA
TGW	E1	FarmCPU	6Brs584209964	6B	584209964	6.3448e-08	7.19758	0.000917141	3.52063	TraesCS6B02G332800.1	XP_020155857.1/0/pentatricopeptide repeat-containing protein At4g39620, chloroplastic [Aegilops tauschii subsp. tauschii]	leucine-rich PPR motif-containing protein	PS51375/11.334/Pentatricopeptide (PPR) repeat profile.	NA
										TraesCS6B02G332800.2	XP_020155857.1/0/pentatricopeptide repeat-containing protein At4g39620, chloroplastic [Aegilops tauschii subsp. tauschii]	leucine-rich PPR motif-containing protein	PS51375/9.536/Pentatricopeptide (PPR) repeat profile.	NA
										TraesCS6B02G332900.1	XP_020155856.1/0/uncharacterized protein LOC109741197 [Aegilops tauschii subsp. tauschii]	alpha-galactosidase	PTHR11452:SF42/2.2E-213/--	biological_process:GO:0005975//carbohydrate metabolic process;molecular_function:GO:0004553//hydrolase activity, hydrolyzing O-glycosyl compounds;
										TraesCS6B02G332900.2	XP_020155856.1/0/uncharacterized protein LOC109741197 [Aegilops tauschii subsp. tauschii]	alpha-galactosidase	PF16499/2.3E-11/Alpha galactosidase A	biological_process:GO:0005975//carbohydrate metabolic process;molecular_function:GO:0004553//hydrolase activity, hydrolyzing O-glycosyl compounds;
TGW	E3	FarmCPU	7Brs320329109	7B	320329109	1.19554e-07	6.92244	0.00126446	-7.44844	TraesCS7B02G188600.1	XP_020194425.1/0/protein ABHD17B-like isoform X1 [Aegilops tauschii subsp. tauschii]	abhydrolase domain-containing protein 17	PTHR12277:SF45/6.4E-196/--	NA
TGW	E2	FarmCPU	NewChr1rs1912542	1R	1912542	9.47887e-10	9.02324	2.85741e-06	1.56845	Sc1Loc01986315.1	XP_021317250.1/6.42704e-25/uncharacterized protein LOC110435683 [Sorghum bicolor]	NA	PTHR10775/5.4E-34/--	NA
										Sc1Loc01986316.1	XP_021321837.1/8.81106e-66/uncharacterized protein LOC110437648 isoform X1 [Sorghum bicolor] &gt;XP_021321838.1 uncharacterized protein LOC110437648 isoform X1 [Sorghum bicolor] &gt;XP_021321840.1 uncharacterized protein LOC110437648 isoform X1 [Sorghum bicolor] &gt;XP_021321841.1 uncharacterized protein LOC110437648 isoform X1 [Sorghum bicolor]	NA	PTHR10775:SF125/4.5E-29/--	NA
										Sc1Loc01986317.1	PAN46520.1/1.34187e-163/hypothetical protein PAHAL_I02830 [Panicum hallii]	calmodulin-binding transcription activator	PF13960/4.6E-25/Domain of unknown function (DUF4218)	NA
										Sc1Loc01986318.1	EMS63500.1/4.18994e-44/hypothetical protein TRIUR3_31077 [Triticum urartu]	NA	PTHR33157/1.9E-74/--	biological_process:GO:0032196//transposition;
TGW	E3	FarmCPU	NewChr3rs208918528	3R	208918528	5.38437e-08	7.26886	8.1156e-05	-0.368286	NA	NA	NA	NA	NA
TGW	E1	FarmCPU	NewChr3rs275357885	3R	275357885	1.02028e-09	8.99128	6.15127e-06	0.249213	Sc1Loc00894731.1	XP_020167659.1/0/uncharacterized protein LOC109753146 [Aegilops tauschii subsp. tauschii]	NA	PF05056/1.5E-28/Protein of unknown function (DUF674)	NA
GA	E3	FarmCPU	1Ars436713499	1A	436713499	1.19193e-10	9.92375	1.65011e-06	24.3733	NA	NA	NA	NA	NA
GA	E1/E2	FarmCPU	3Ars164571570	3A	164571570	1.80975e-08	7.74238	0.000168347	1.15881	TraesCS3A02G162200.1	CDM82476.1/0/unnamed protein product [Triticum aestivum]	ribosomal protein S6 kinase	PTHR33086/4.9E-159/--	NA
										TraesCS3A02G162300.1	EMS56441.1/4.47525e-165/hypothetical protein TRIUR3_23847 [Triticum urartu]	ribosomal protein S6 kinase	PTHR33086:SF8/4.1E-110/--	NA
GL	E2/E3	FarmCPU	1Ars24959399	1A	24959399	6.24272e-14	13.2046	8.64242e-10	7.3431	TraesCS1A02G044100.1	XP_020156211.1/6.67941e-113/uncharacterized protein LOC109741530 [Aegilops tauschii subsp. tauschii] &gt;EMT31394.1 hypothetical protein F775_24077 [Aegilops tauschii]	hypothetical protein F775_24077	PTHR24136/6.3E-21/--	NA
										TraesCS1A02G044200.1	XP_020146704.1/0/protein transport protein SEC13 homolog B-like [Aegilops tauschii subsp. tauschii] &gt;XP_020146705.1 protein transport protein SEC13 homolog B-like [Aegilops tauschii subsp. tauschii] &gt;XP_020146706.1 protein transport protein SEC13 homolog B-like [Aegilops tauschii subsp. tauschii] &gt;XP_020146707.1 protein transport protein SEC13 homolog B-like [Aegilops tauschii subsp. tau…	transport protein SEC13	PTHR11024/4.1E-172/--	biological_process:GO:1904263//positive regulation of TORC1 signaling;GO:0090114//COPII-coated vesicle budding;GO:0016192//vesicle-mediated transport;cellular_component:GO:0030127//COPII vesicle coat;molecular_function:GO:0005515//protein binding;GO:0005198//structural molecule activity;
GL	E1	FarmCPU	1Ars26145936	1A	26145936	4.70626e-20	19.3273	6.51535e-16	-0.417452	NA	NA	NA	NA	NA
GL	E3	FarmCPU	1Ars436948202	1A	436948202	5.96931e-08	7.22408	0.000275464	0.288943	NA	NA	NA	NA	NA
GL	E1	FarmCPU	1Brs116609028	1B	116609028	1.89322e-08	7.7228	0.00034644	-0.688877	NA	NA	NA	NA	NA
GL	E1	FarmCPU	1Brs173269562	1B	173269562	1.63186e-08	7.78732	0.000218426	-0.493207	TraesCS1B02G136000.1	BAK05988.1/2.75628e-98/predicted protein [Hordeum vulgare subsp. vulgare]	NA	PTHR33638/1.5E-48/--	NA
GL	E3	FarmCPU	1Brs486290040	1B	486290040	8.86141e-08	7.0525	0.000405387	6.54609	NA	NA	NA	NA	NA
GL	E2/E3	FarmCPU	1Brs496533861	1B	496533861	2.3873e-08	7.62209	0.000218426	-0.438768	TraesCS1B02G285400.1	XP_020158827.1/0/glucan endo-1,3-beta-glucosidase 14-like isoform X2 [Aegilops tauschii subsp. tauschii]	glucan endo-1,3-beta-glucosidase	PTHR32227:SF143/3.6E-215/--	biological_process:GO:0005975//carbohydrate metabolic process;molecular_function:GO:0004553//hydrolase activity, hydrolyzing O-glycosyl compounds;
										TraesCS1B02G285500.1	AAL92109.1/3.10768e-109/ferredoxin precursor [Triticum aestivum]	ferredoxin	PTHR43112:SF11/9.6E-91/--	molecular_function:GO:0009055//electron transfer activity;GO:0051537//2 iron, 2 sulfur cluster binding;GO:0051536//iron-sulfur cluster binding;
										TraesCS1B02G285600.1	XP_020158805.1/0/uncharacterized protein LOC109744122 [Aegilops tauschii subsp. tauschii]	NA	PTHR34949:SF2/7.6E-140/--	biological_process:GO:0048193//Golgi vesicle transport;cellular_component:GO:0016020//membrane;
										TraesCS1B02G285700.1	XP_020158797.1/0/cell division protein FtsZ homolog 2-2, chloroplastic-like [Aegilops tauschii subsp. tauschii]	GTPase	PR00423/6.0E-51/Cell division protein FtsZ signature	cellular_component:GO:0005737//cytoplasm;molecular_function:GO:0005525//GTP binding;GO:0003924//GTPase activity;
GL	E3	FarmCPU	2Brs526017970	2B	526017970	1.10228e-08	7.95771	6.98808e-05	-0.805397	NA	NA	NA	NA	NA
GL	E3	FarmCPU	2Brs642348583	2B	642348583	2.26521e-08	7.64489	0.000215411	-13.9022	NA	NA	NA	NA	NA
GL	E2	FarmCPU	2Brs652568165	2B	652568165	7.24671e-09	8.13986	6.40053e-05	15.9253	TraesCS2B02G457900.1	XP_020164175.1/0/serine/arginine repetitive matrix protein 1 [Aegilops tauschii subsp. tauschii]	NA	PTHR31346:SF10/1.6E-112/--	biological_process:GO:0016554//cytidine to uridine editing;
										TraesCS2B02G458000.1	XP_020164170.1/2.3682e-116/uncharacterized protein LOC109749630 [Aegilops tauschii subsp. tauschii]	solute carrier family 35	PTHR11639/4.0E-87/--	NA
										TraesCS2B02G458100.1	XP_020164181.1/1.90257e-123/uncharacterized protein LOC109749642 [Aegilops tauschii subsp. tauschii] &gt;EMT26704.1 hypothetical protein F775_31906 [Aegilops tauschii]	solute carrier family 35	PTHR11639:SF62/1.8E-53/--	molecular_function:GO:0005509//calcium ion binding;
GL	E1	FarmCPU	3Ars338084031	3A	338084031	4.00145e-09	8.39778	7.51913e-05	-1.80092	NA	NA	NA	NA	NA
GL	E1	FarmCPU	3Ars522719480	3A	522719480	1.18837e-08	7.92505	0.000223307	-4.29581	NA	NA	NA	NA	NA
GL	E2	FarmCPU	3Ars553947080	3A	553947080	6.92666e-08	7.15948	0.000433863	-17.0999	NA	NA	NA	NA	NA
GL	E1/E2	FarmCPU	3Ars698575214	3A	698575214	5.6148e-09	8.25067	2.63769e-05	10.1867	NA	NA	NA	NA	NA
GL	E1	FarmCPU	4Ars400842449	4A	400842449	3.33599e-08	7.47678	0.00064558	-17.8697	TraesCS4A02G166300.1	EMS67186.1/3.74719e-103/hypothetical protein TRIUR3_27249 [Triticum urartu]	NA	NA	NA
GL	E1	FarmCPU	4Ars624529437	4A	624529437	2.16998e-09	8.66355	2.09967e-05	0.16	NA	NA	NA	NA	NA
GL	E1	FarmCPU	4Ars690406745	4A	690406745	4.02958e-08	7.39474	0.000779804	-31.4562	TraesCS4A02G419600.1	EMS46992.1/0/Cell cycle checkpoint protein RAD1 [Triticum urartu]	cell cycle checkpoint protein	PR01246/5.1E-6/Rad1 repair protein signature	biological_process:GO:0000077//DNA damage checkpoint;cellular_component:GO:0005634//nucleus;
GL	E2	FarmCPU	5Ars412786187	5A	412786187	6.71578e-09	8.1729	3.83202e-05	10.4091	NA	NA	NA	NA	NA
GL	E1	FarmCPU	5Brs198739449	5B	198739449	2.06777e-08	7.6845	0.000129138	-0.375701	NA	NA	NA	NA	NA
GL	E1	FarmCPU	5Brs301313731	5B	301313731	8.68466e-09	8.06125	6.93427e-05	-20.8157	TraesCS5B02G163300.1	XP_020156937.1/0/HSP-interacting protein [Aegilops tauschii subsp. tauschii]	mitochondrial import receptor subunit TOM70	PF00564/5.6E-17/PB1 domain	molecular_function:GO:0005515//protein binding;
GL	E1	FarmCPU	5Brs434367160	5B	434367160	2.72567e-08	7.56453	0.000145088	-13.6315	TraesCS5B02G251700.1	XP_020200463.1/0/uncharacterized protein LOC109786297 [Aegilops tauschii subsp. tauschii]	NA	PF03941/7.5E-9/Inner centromere protein, ARK binding region	biological_process:GO:0000226//microtubule cytoskeleton organization;cellular_component:GO:0015630//microtubule cytoskeleton;
										TraesCS5B02G251800.1	XP_020200466.1/0/uncharacterized protein LOC109786299 [Aegilops tauschii subsp. tauschii]	16S rRNA (cytosine967-C5)-methyltransferase	PR02008/7.1E-24/RNA (C5-cytosine) methyltransferase signature	biological_process:GO:0006355//regulation of transcription, DNA-templated;molecular_function:GO:0003723//RNA binding;GO:0008168//methyltransferase activity;
										TraesCS5B02G251900.2	XP_020200464.1/0/cellulose synthase-like protein E6 isoform X1 [Aegilops tauschii subsp. tauschii]	cellulose synthase A catalytic subunit 7 [UDP-forming]-like	PTHR13301:SF67/0.0/--	biological_process:GO:0030244//cellulose biosynthetic process;cellular_component:GO:0016020//membrane;molecular_function:GO:0016760//cellulose synthase (UDP-forming) activity;
GL	E2	FarmCPU	5Brs531627165	5B	531627165	2.42604e-08	7.6151	0.000129138	0.412383	TraesCS5B02G351200.1	EMT12683.1/5.39973e-94/hypothetical protein F775_00357 [Aegilops tauschii]	NA	NA	NA
										TraesCS5B02G351300.1	XP_020196233.1/9.3605e-79/uncharacterized protein LOC109782060 [Aegilops tauschii subsp. tauschii]	NA	NA	biological_process:GO:0006412//translation;cellular_component:GO:0005840//ribosome;GO:0005622//intracellular;molecular_function:GO:0003735//structural constituent of ribosome;
										TraesCS5B02G351400.1	XP_020183733.1/0/uncharacterized protein LOC109769396 [Aegilops tauschii subsp. tauschii] &gt;XP_020194275.1 uncharacterized protein LOC109780100 [Aegilops tauschii subsp. tauschii]	stress-induced-phosphoprotein 1	NA	NA
										TraesCS5B02G351500.1	BAK06455.1/0/predicted protein [Hordeum vulgare subsp. vulgare]	HtrA serine peptidase 2	NA	NA
										TraesCS5B02G351600.3	XP_020151249.1/0/uncharacterized protein LOC109736439 [Aegilops tauschii subsp. tauschii]	HtrA serine peptidase 2	NA	NA
										TraesCS5B02G351700.1	XP_020151256.1/0/uncharacterized protein LOC109736441 isoform X3 [Aegilops tauschii subsp. tauschii]	HtrA serine peptidase 2	NA	NA
GL	E3	FarmCPU	6Ars120274149	6A	120274149	1.14538e-10	9.94105	1.01057e-06	0.603455	NA	NA	NA	NA	NA
GL	E2/E3	FarmCPU	6Ars455341188	6A	455341188	1.24746e-08	7.90397	5.53401e-05	5.66916	TraesCS6A02G243900.1	XP_020155278.1/0/beta-D-xylosidase 3-like [Aegilops tauschii subsp. tauschii]	xylan 1,4-beta-xylosidase		biological_process:GO:0005975//carbohydrate metabolic process;molecular_function:GO:0004553//hydrolase activity, hydrolyzing O-glycosyl compounds;
GL	E1	FarmCPU	6Brs93022539	6B	93022539	8.77581e-11	10.0567	1.26854e-06	-12.2146	NA	NA	NA	NA	NA
GL	E2	FarmCPU	7Ars678535183	7A	678535183	2.3135e-09	8.63573	4.98676e-05	6.65099	TraesCS7A02G488200.1	EMS47850.1/0/Serine/threonine-protein kinase HT1 [Triticum urartu]	serine/threonine-protein kinase		biological_process:GO:0006468//protein phosphorylation;molecular_function:GO:0005524//ATP binding;GO:0004672//protein kinase activity;
GL	E2	FarmCPU	7Brs122555162	7B	122555162	4.947e-09	8.30566	0.000104644	8.10197	NA	NA	NA	NA	NA
GL	E1	FarmCPU	7Brs44632951	7B	44632951	1.39585e-09	8.85516	2.95264e-05	12.3138	TraesCS7B02G045600.1	XP_020199741.1/0/receptor kinase-like protein Xa21 [Aegilops tauschii subsp. tauschii] &gt;XP_020199742.1 receptor kinase-like protein Xa21 [Aegilops tauschii subsp. tauschii] &gt;XP_020199744.1 receptor kinase-like protein Xa21 [Aegilops tauschii subsp. tauschii] &gt;XP_020199745.1 receptor kinase-like protein Xa21 [Aegilops tauschii subsp. tauschii]	LRR receptor-like serine/threonine-protein kinase EFR		biological_process:GO:0006468//protein phosphorylation;molecular_function:GO:0005524//ATP binding;GO:0005515//protein binding;GO:0004672//protein kinase activity;
GL	E3	FarmCPU	7Brs708281208	7B	708281208	4.19377e-09	8.3774	2.95703e-05	1.22515	NA	NA	NA	NA	NA
GL	E2	FarmCPU	NewChr1rs148793315	1R	148793315	8.67756e-09	8.0616	4.10883e-05	-0.407066	NA	NA	NA	NA	NA
GL	E2	FarmCPU	NewChr1rs214335798	1R	214335798	4.53141e-10	9.34377	2.14562e-06	-0.343965	NA	NA	NA	NA	NA
GL	E3	FarmCPU	NewChr1rs225455761	1R	225455761	2.93147e-10	9.53292	1.38805e-06	-0.472044	NA	NA	NA	NA	NA
GL	E3	FarmCPU	NewChr1rs3802533	1R	3802533	2.78844e-11	10.5546	1.32032e-07	12.6046	NA	NA	NA	NA	NA
GL	E3	FarmCPU	NewChr1rs91662597	1R	91662597	1.26581e-07	6.89763	0.000199787	9.87984	NA	NA	NA	NA	NA
GL	E2	FarmCPU	NewChr2rs277335579	2R	277335579	2.94864e-11	10.5304	1.39618e-07	13.17	Sc2Loc01364628.3	XP_015691427.1/0/PREDICTED: probable metal-nicotianamine transporter YSL6, partial [Oryza brachyantha]	50S ribosomal protein L28		biological_process:GO:0055085//transmembrane transport;
GL	E3	FarmCPU	NewChr2rs86305587	2R	86305587	2.19273e-08	7.65901	0.000103826	-10.5773	NA	NA	NA	NA	NA
GL	E3	FarmCPU	NewChr3rs108192812	3R	108192812	5.88245e-08	7.23044	0.000139267	0.296246	NA	NA	NA	NA	NA
GL	E3	FarmCPU	NewChr3rs12893285	3R	12893285	1.83167e-10	9.73715	6.37053e-07	-0.523177	NA	NA	NA	NA	NA
GL	E3	FarmCPU	NewChr3rs7345163	3R	7345163	1.1116e-07	6.95405	0.000386613	-1.57919	NA	NA	NA	NA	NA
GL	E3	FarmCPU	NewChr3rs73577002	3R	73577002	1.18355e-08	7.92681	2.05819e-05	0.952502	NA	NA	NA	NA	NA
GL	E3	FarmCPU	NewChr4rs138356015	4R	138356015	5.33815e-09	8.27261	1.85661e-05	0.913291	Sc4Loc01544688.3	EMS57921.1/1.84936e-94/Proteasome subunit beta type-5 [Triticum urartu]	20S proteasome subunit beta 5	NA	biological_process:GO:0051603//proteolysis involved in cellular protein catabolic process;cellular_component:GO:0005839//proteasome core complex;molecular_function:GO:0004175//endopeptidase activity;GO:0004298//threonine-type endopeptidase activity;
GL	E2/E3	FarmCPU	NewChr4rs160272070	4R	160272070	2.00992e-08	7.69682	6.99051e-05	0.345612	NA	NA	NA	NA	NA
GL	E2	FarmCPU	NewChr4rs4583927	4R	4583927	3.11508e-08	7.50653	4.4146e-05	-0.425505	NA	NA	NA	NA	NA
GL	E2	FarmCPU	NewChr5rs20723100	5R	20723100	4.39983e-09	8.35656	7.7217e-06	13.1547	NA	NA	NA	NA	NA
GL	E1	FarmCPU	NewChr6rs162985663	6R	162985663	5.03088e-08	7.29836	4.4146e-05	-0.226411	NA	NA	NA	NA	NA
GL	E1	FarmCPU	NewChr6rs64132048	6R	64132048	5.63308e-08	7.24925	9.88606e-05	0.289028	NA	NA	NA	NA	NA
GL	E3	FarmCPU	NewChr6rs6715973	6R	6715973	8.00515e-08	7.09663	0.00014049	12.1325	NA	NA	NA	NA	NA
GW	E2	FarmCPU	4Ars134389315	4A	134389315	5.19663e-08	7.28428	0.000846337	2.16227	NA	NA	NA	NA	NA
GW	E2	FarmCPU	4Ars604383967	4A	604383967	2.75201e-14	13.5603	5.3257e-10	-11.9125	NA	NA	NA	NA	NA
